# Supplementary material for: Cerca d’automorfismes i d’isomorfismes de grafs: algorismes i implementació
Source: Royal Society of Chemistry journal article supplement (doi:10.1039/c6ob01701k), 2013-06-23
Supplement: c6ob01701k1.pdf [file c6ob01701k1.pdf]

## Supplementary Information

### **A metal-free one-pot synthesis of benzo[*c*]chromen-6-ones from 3, 4- dichlorocoumarin and butadiene by tandem photo-thermal-photo reactions**

Yan Zhang<sup>†</sup>, Yan Tian<sup>‡</sup>, Pei Xiang<sup>†</sup>, Ning Huang<sup>‡</sup>, Jianyi Wang<sup>†</sup>, Jian-Hua Xu<sup>§</sup>, Min Zhang<sup>\*, †</sup>

<sup>†</sup>School of Chemistry and Chemical Engineering, Guangxi University, Nanning, Guangxi 530004, China

<sup>‡</sup>Guangxi Environmental Monitoring Center, Nanning, Guangxi 530028, China

<sup>§</sup>School of Chemistry and Chemical Engineering, Nanjing University, Nanjing, Jiangsu 210093, China

## Contents

|                                                     |     |
|-----------------------------------------------------|-----|
| 1. The synthesis details of starting materials..... | S3  |
| 2. The NMR charts of compounds .....                | S6  |
| 3. The crystal data.....                            | S38 |

## 1. The synthesis details of starting materials.

a) The syntheses of 3, 4-dichlorocoumarins <sup>1</sup>

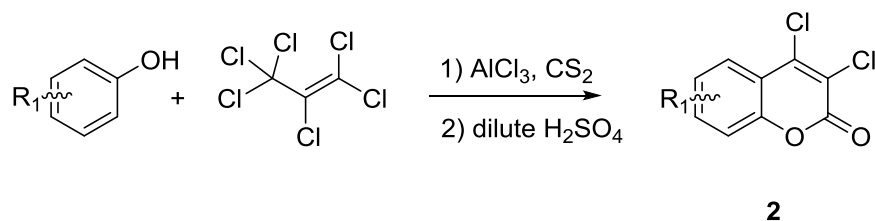

The syntheses of 3, 4-dichlorocoumarins are carried out as described in lit 1. The reaction started from phenols and hexachloropropene catalyzed by AlCl<sub>3</sub> in CS<sub>2</sub> and the solvent was removed. The residue was put in cold dilute H<sub>2</sub>SO<sub>4</sub> and filtered, oven dried. The crude product was purified by silica gel chromatography. The proton NMR for the dichlorocoumarins are given below:

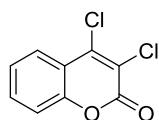

### 2a

*3, 4-dichlorocoumarin (3, 4-dichloro-2H-chromen-2-one)*

White needles, m.p. 106-108 °C (Acetone/PE, 2/1, V/V)

<sup>1</sup>H NMR (600 MHz, CDCl<sub>3</sub>) δ 7.91 (d, *J* = 8.0 Hz, 1H), 7.66 (t, *J* = 7.8 Hz, 1H), 7.45 (t, *J* = 7.7 Hz, 1H), 7.42 (d, *J* = 7.9 Hz, 1H).

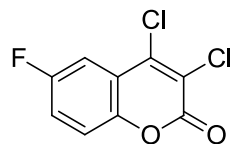

### 2b

*3, 4-dichloro-6-fluoro-2H-chromen-2-one*

White needle crystal m.p. 106-108 °C (Acetone/PE, 2/1, V/V)

<sup>1</sup>H NMR (600 MHz, CDCl<sub>3</sub>) δ 7.55 (dd, *J* = 8.4, 2.9 Hz, 1H), 7.40 – 7.36 (m, 1H), 7.34 (m, 1H).

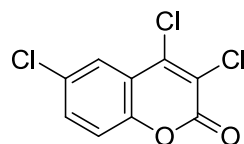

### 2c

*3, 4, 6-trichloro-2H-chromen-2-one*

White needles, m.p. 130-132 °C (Acetone/PE, 2/1, V/V)

<sup>1</sup>H NMR (600 MHz, CDCl<sub>3</sub>) δ 7.85 (d, *J* = 2.4 Hz, 1H), 7.60 – 7.55 (m, 1H), 7.34 (d, *J* = 8.8 Hz, 1H).

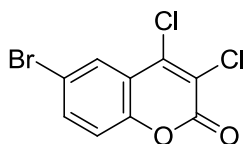

### 2d

#### 6-bromo-3,4-dichloro-2H-chromen-2-one

Yellow needles, m.p. 144-146 °C (Acetone/PE, 2/1, V/V)

<sup>1</sup>H NMR (600 MHz, CDCl<sub>3</sub>) δ 7.98 (t, *J* = 2.1 Hz, 1H), 7.70 (ddd, *J* = 8.8, 1.5, 0.6 Hz, 1H), 7.27 (d, *J* = 8.8 Hz, 1H).

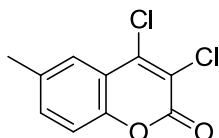

### 2e

#### 3,4-dichloro-6-methyl-2H-chromen-2-one

White needles, m.p. 160-164 °C (Acetone/PE, 2/1, V/V)

<sup>1</sup>H NMR (600 MHz, CDCl<sub>3</sub>) δ 7.65 (s, 1H), 7.42 (d, *J* = 8.4 Hz, 1H), 7.28 (d, *J* = 8.4 Hz, 1H), 2.47 (s, 4H).

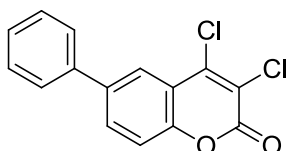

### 2f

#### 3,4-dichloro-6-phenyl-2H-chromen-2-one

White needles, m.p. 146-148 °C (Acetone/PE, 2/1, V/V)

<sup>1</sup>H NMR (600 MHz, CDCl<sub>3</sub>) δ 8.04 (d, *J* = 2.1 Hz, 1H), 7.84 (dd, *J* = 5.5, 3.8 Hz, 1H), 7.64 – 7.58 (m, 2H), 7.52 – 7.48 (m, 2H), 7.47 (dd, *J* = 8.3, 4.0 Hz, 1H), 7.45 – 7.40 (m, 1H).

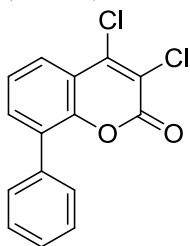

### 2g

#### 3,4-dichloro-8-phenyl-2H-chromen-2-one

White flocculent solid, m.p. 148-150 °C (Acetone/PE, 2/1, V/V)

<sup>1</sup>H NMR (600 MHz, CDCl<sub>3</sub>) δ 7.90 (dd, *J* = 8.0, 1.6 Hz, 1H), 7.66 (dd, *J* = 7.6, 1.6 Hz, 1H), 7.56 (dt, *J* = 8.1, 1.7 Hz, 2H), 7.49 (ddd, *J* = 7.8, 6.0, 2.5 Hz, 3H), 7.46 – 7.41 (m, 1H).

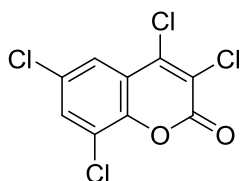

## 2h

3, 4, 6, 8-tetrachloro-2H-chromen-2-one

Yellow block crystals, m.p. 158-160 °C (Acetone/PE, 2/1, V/V)

<sup>1</sup>H NMR (600 MHz, CDCl<sub>3</sub>) δ 7.75 (d, J = 2.5 Hz, 1H), 7.65 (d, J = 2.4 Hz, 1H).

b) The synthesis of 2, 3-dimethoxy-1, 3-butadiene<sup>2</sup> (**3b**)

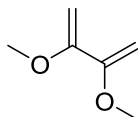

The synthesis of **3b** is carried out as described in the Supporting Information of lit 2: A mixture of biacetyl (17.20 g, 0.20 mol), absolute methanol (25 ml, 1.25 mol), trimethyl orthoformate (63.60 g, 0.60 mol) and concentrated sulfuric acid (5 drops) was refluxed for 10h. The excess of reagents were distilled off and the remaining liquid was vacuum-distilled. Ammonium dihydrogenphosphate (25 mg) and a few crystals of hydroquinone were added and the liquid was heated at 100°C to 110°C. Methanol slowly distilled over, together with some remaining orthoformate. The temperature was raised (160 °C to 170 °C) and the colorless oily liquid collected between 129°C and 132°C (17.30 g or 76% of crude diene). Redistillation gave 2, 3-dimethoxy-1, 3-butadiene (15.50 g, 68%), b. p. 132-132.5 °C.

## References

1. M. S. Newman and S. Schiff, *J. Am. Chem. Soc.*, 1959, **81**, 2266-2270.
2. J. Reichwagen, H. Hopf, A. Del Guerso, C. Belin, H. Bouas-Laurent and J.-P. Desvergne, *Org. Lett.*, 2005, **7**, 971-974.

## 2. The NMR charts of compounds

**1a**

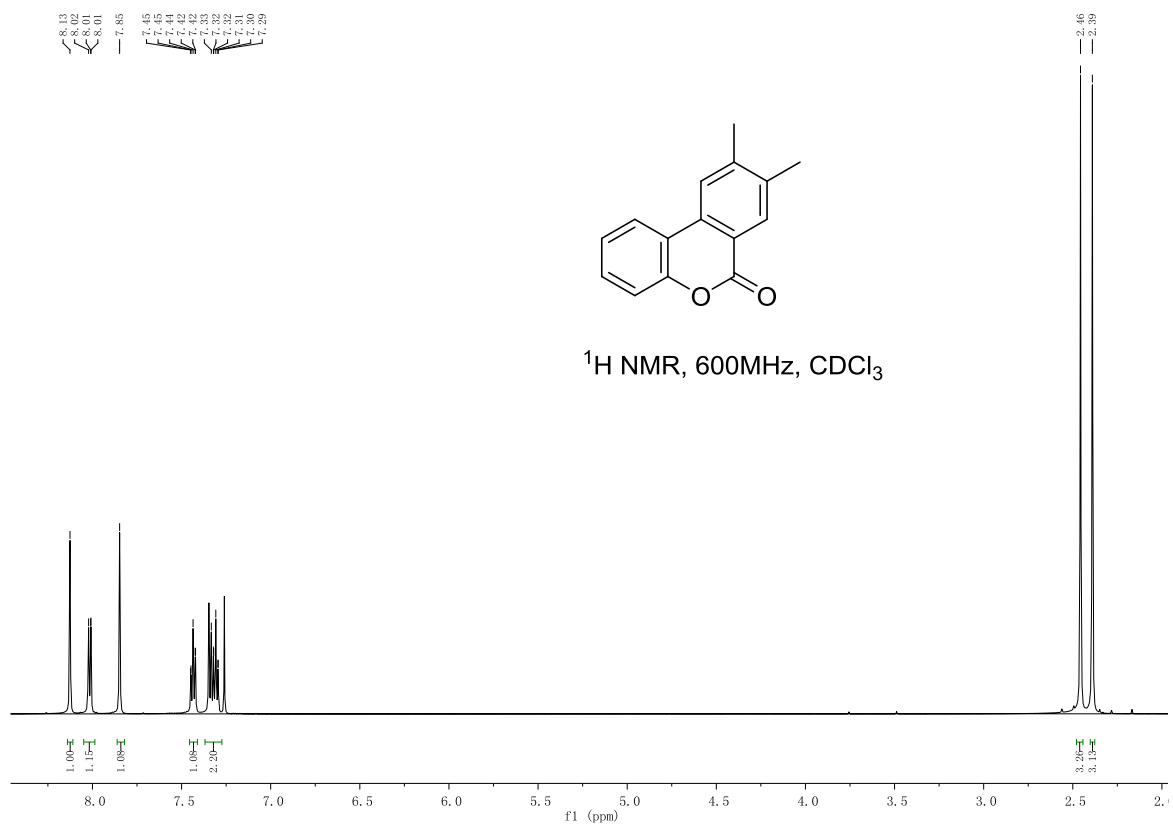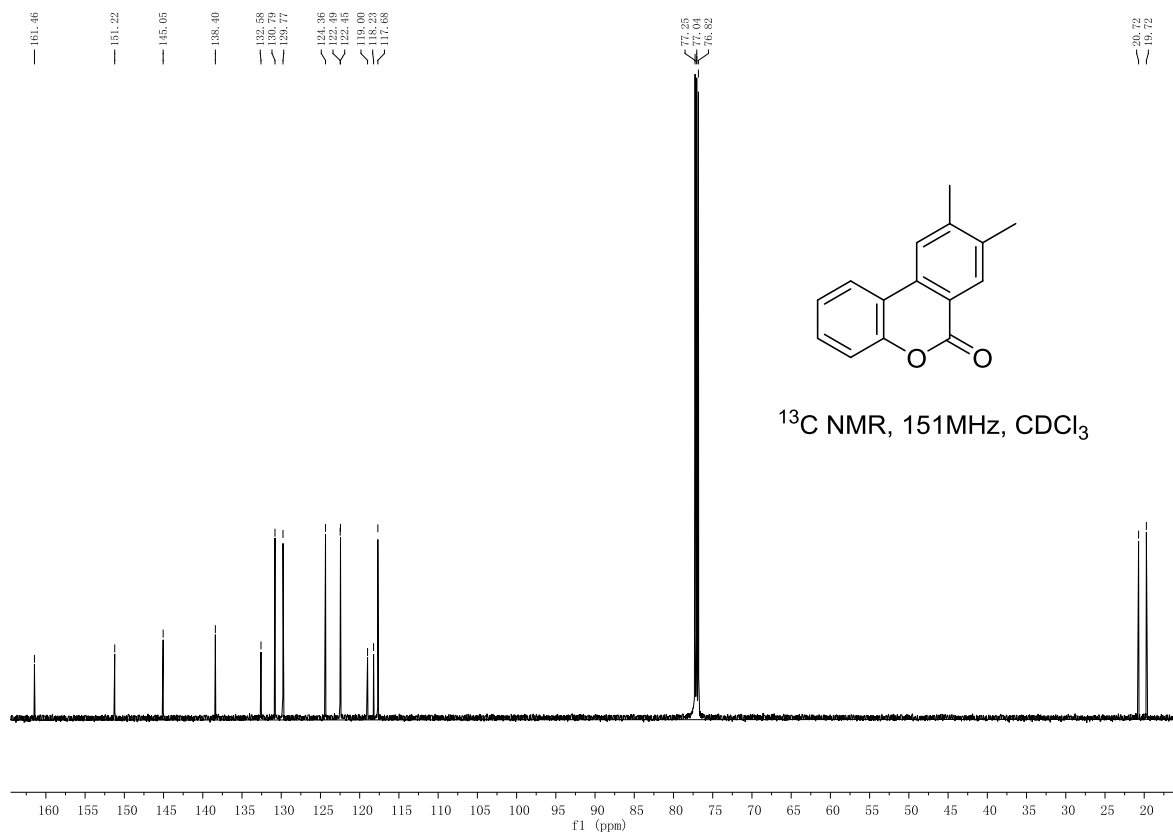

1b

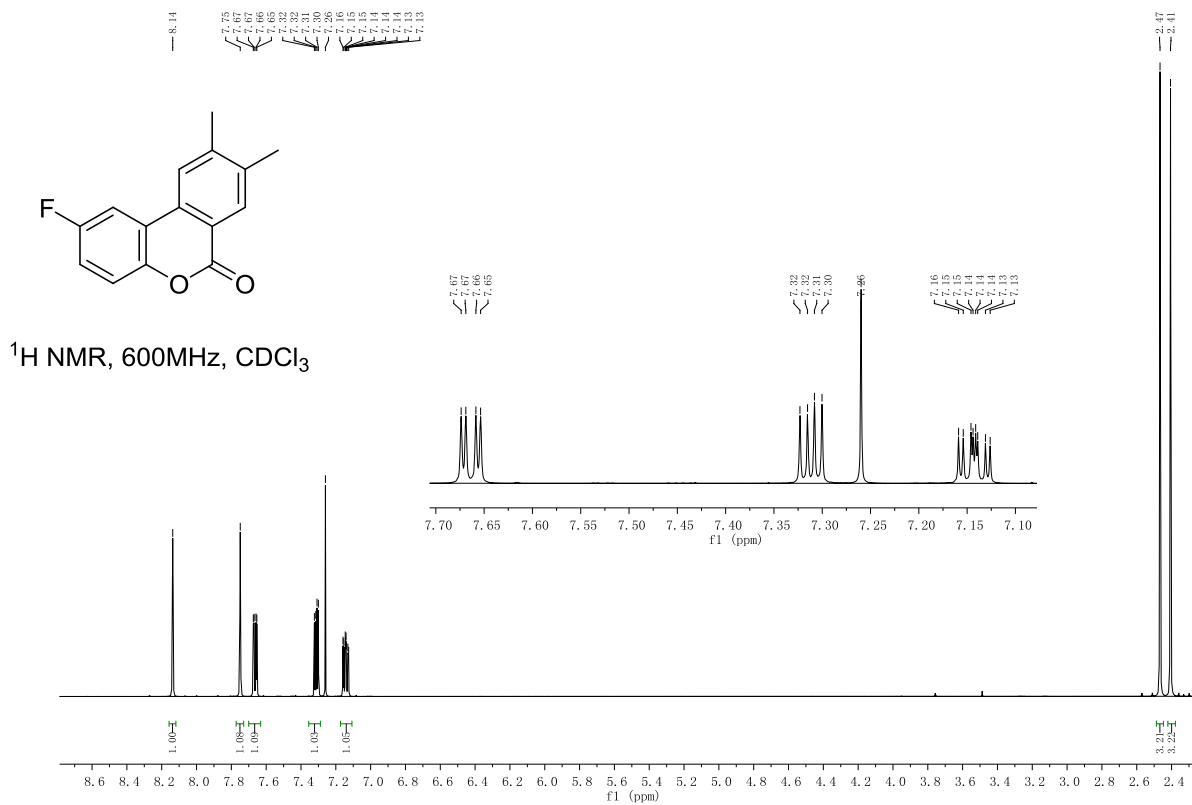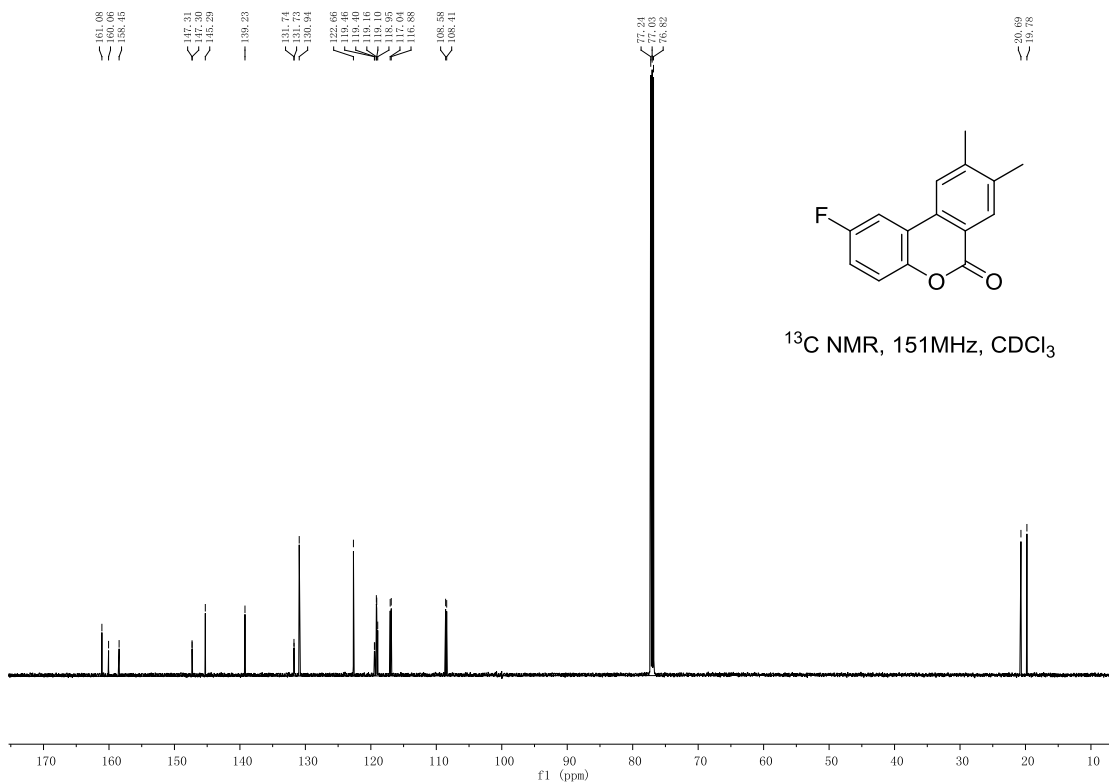







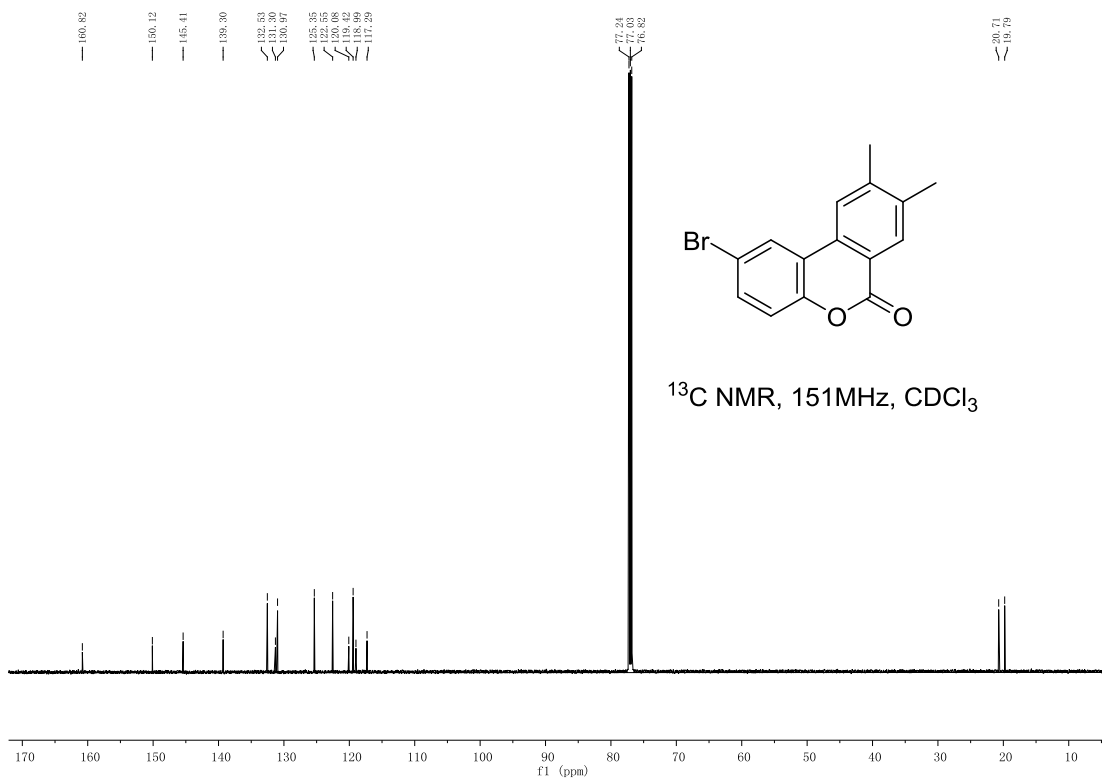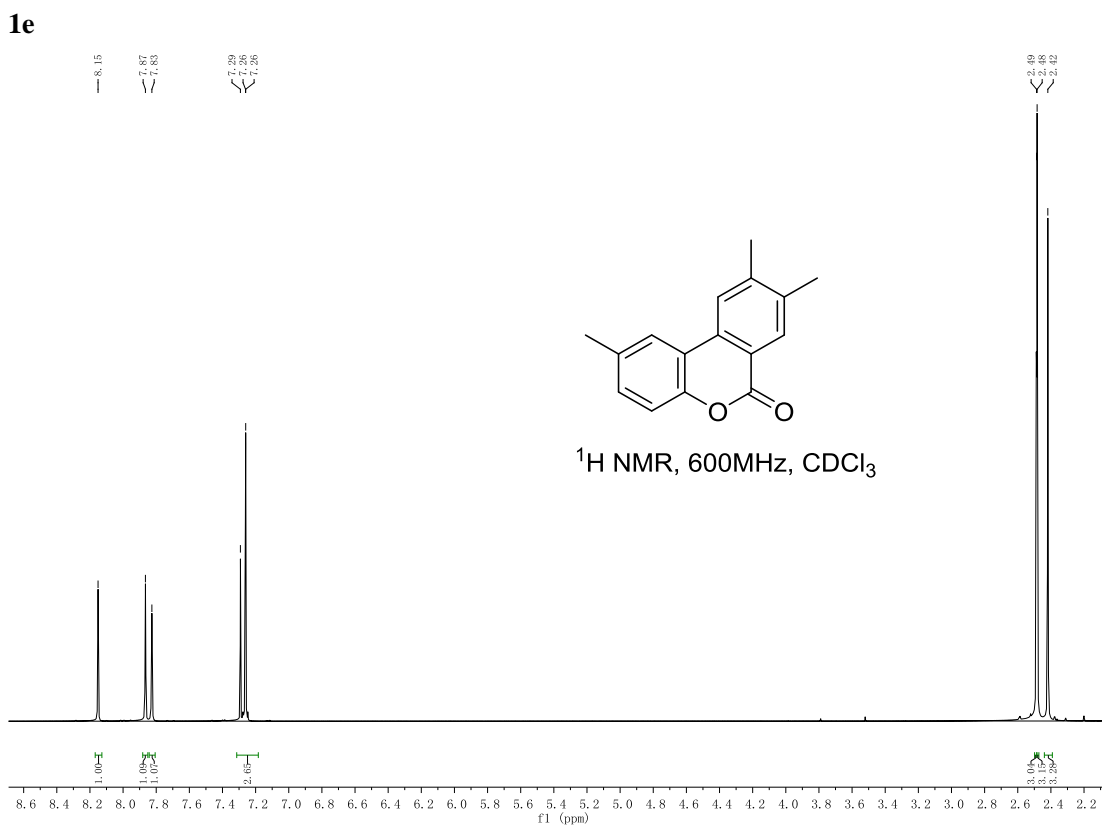

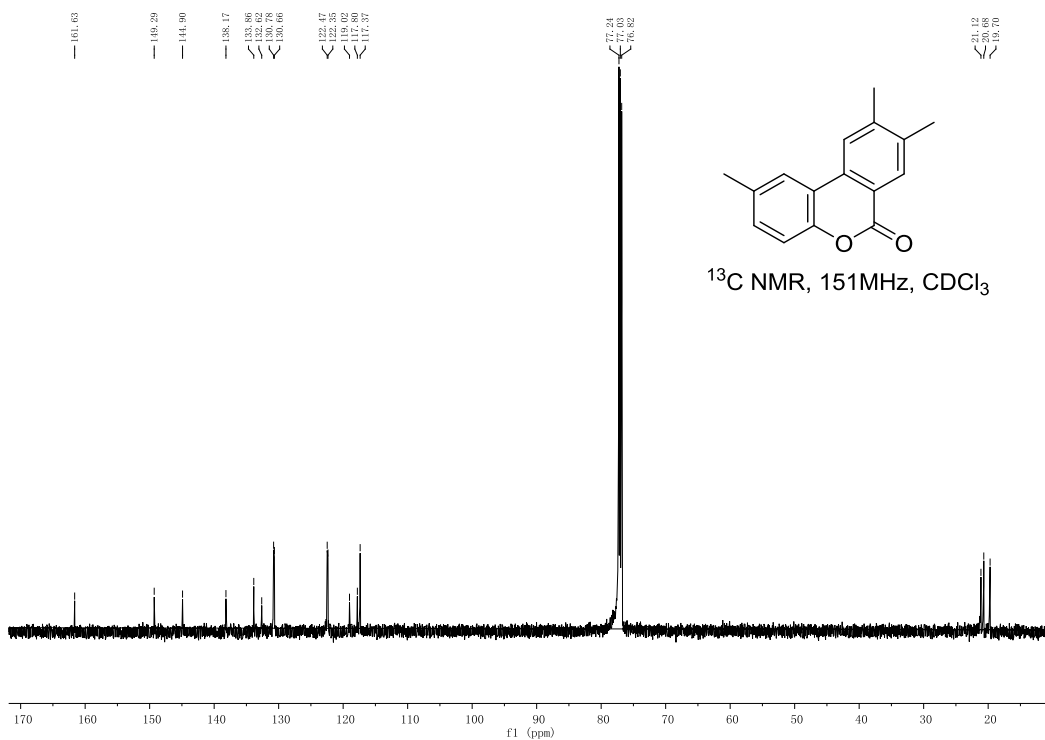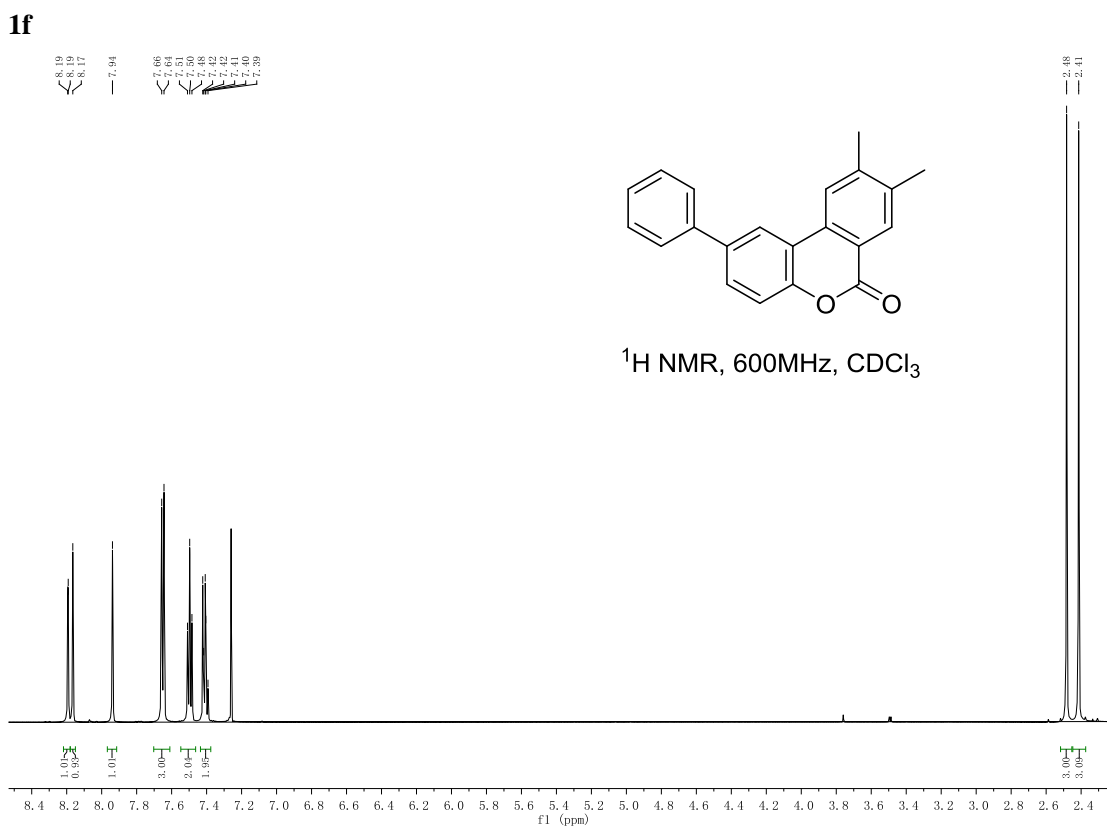

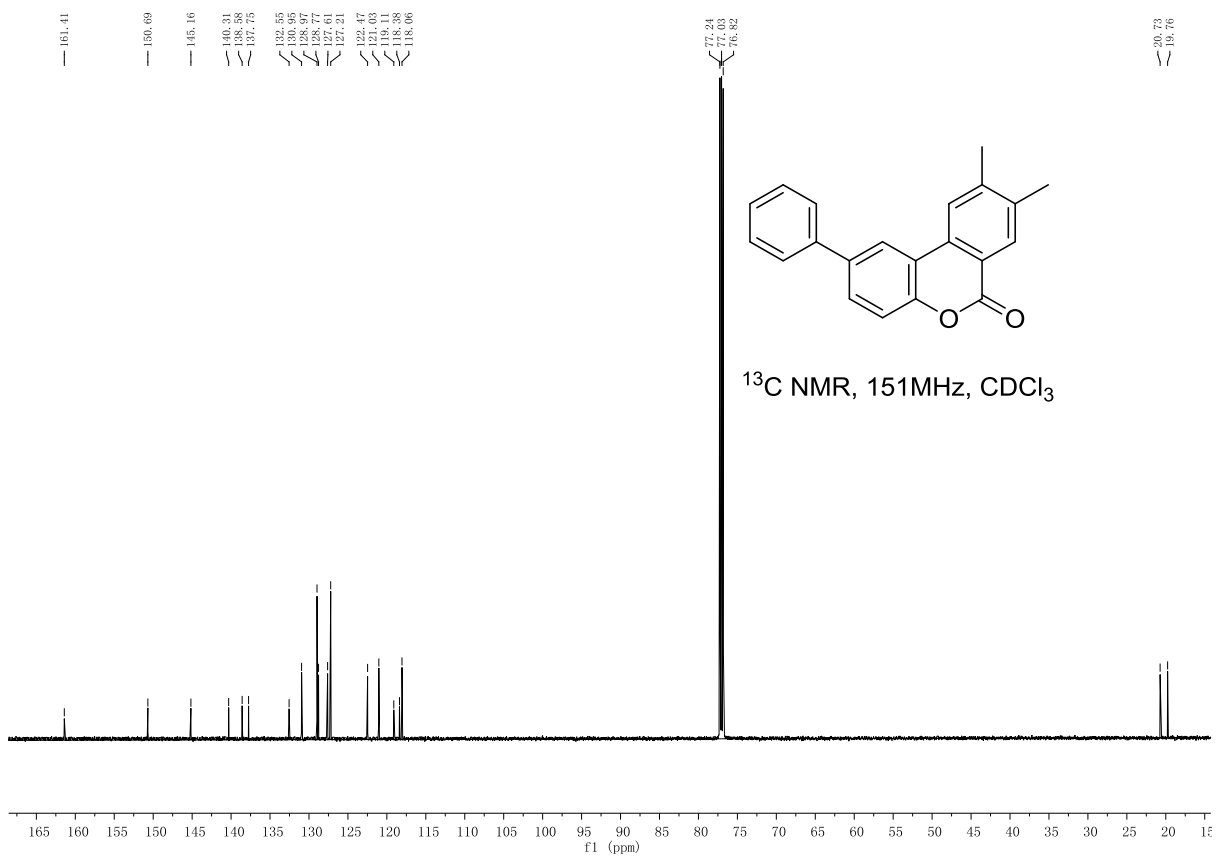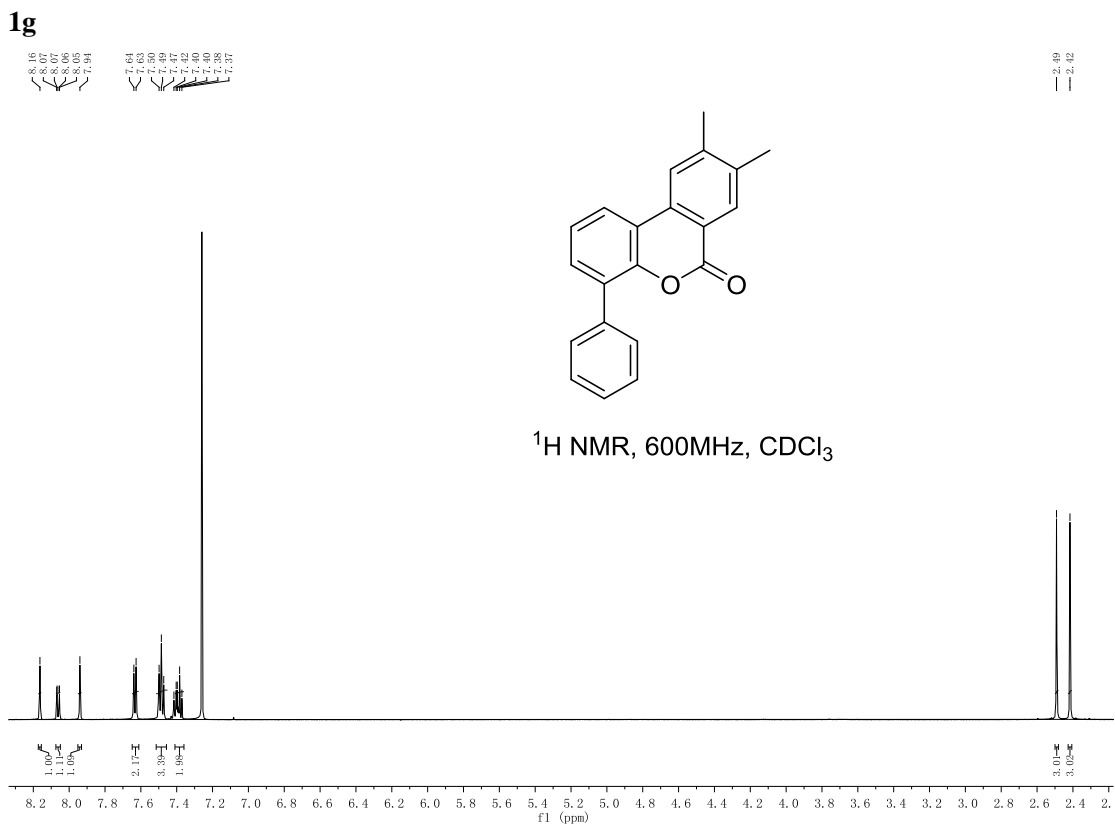

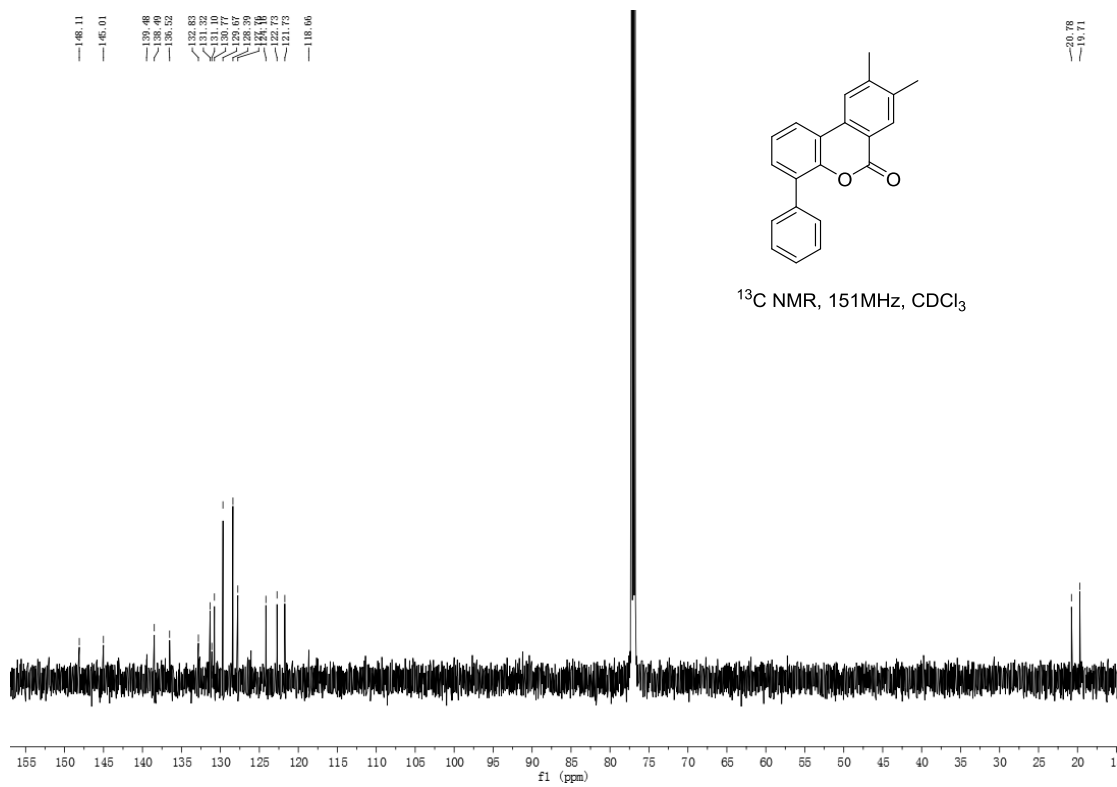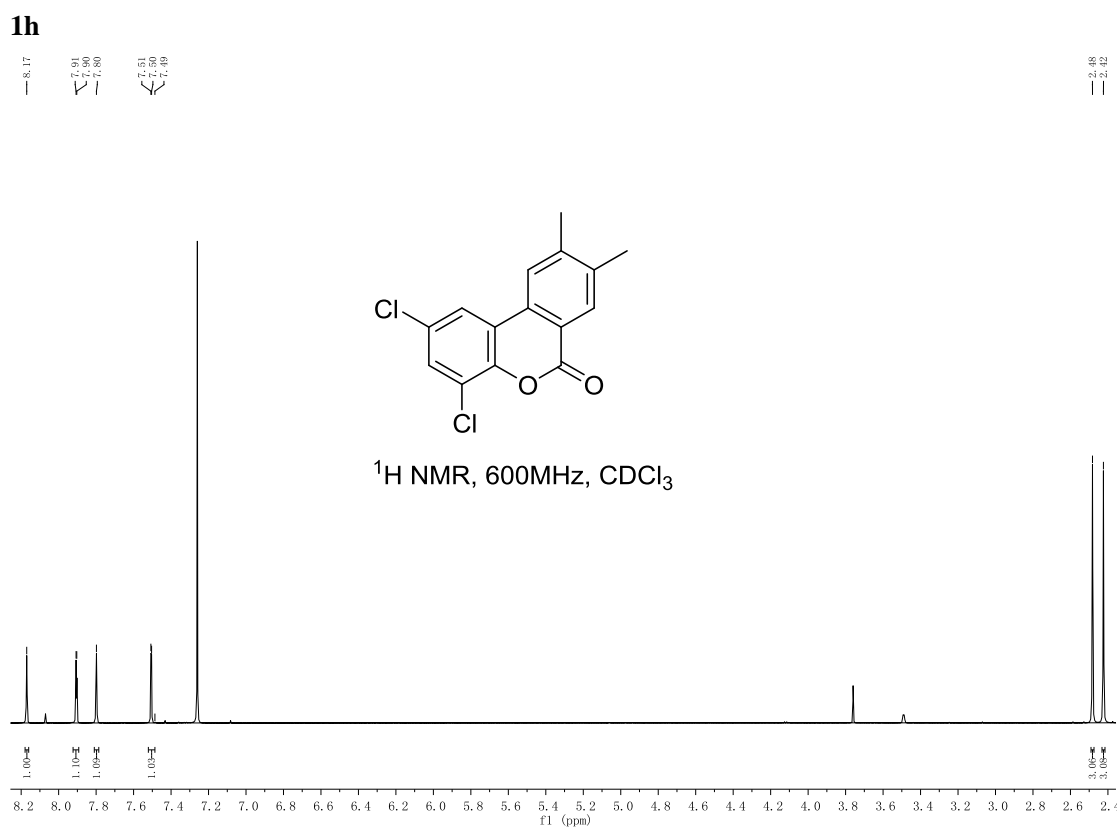

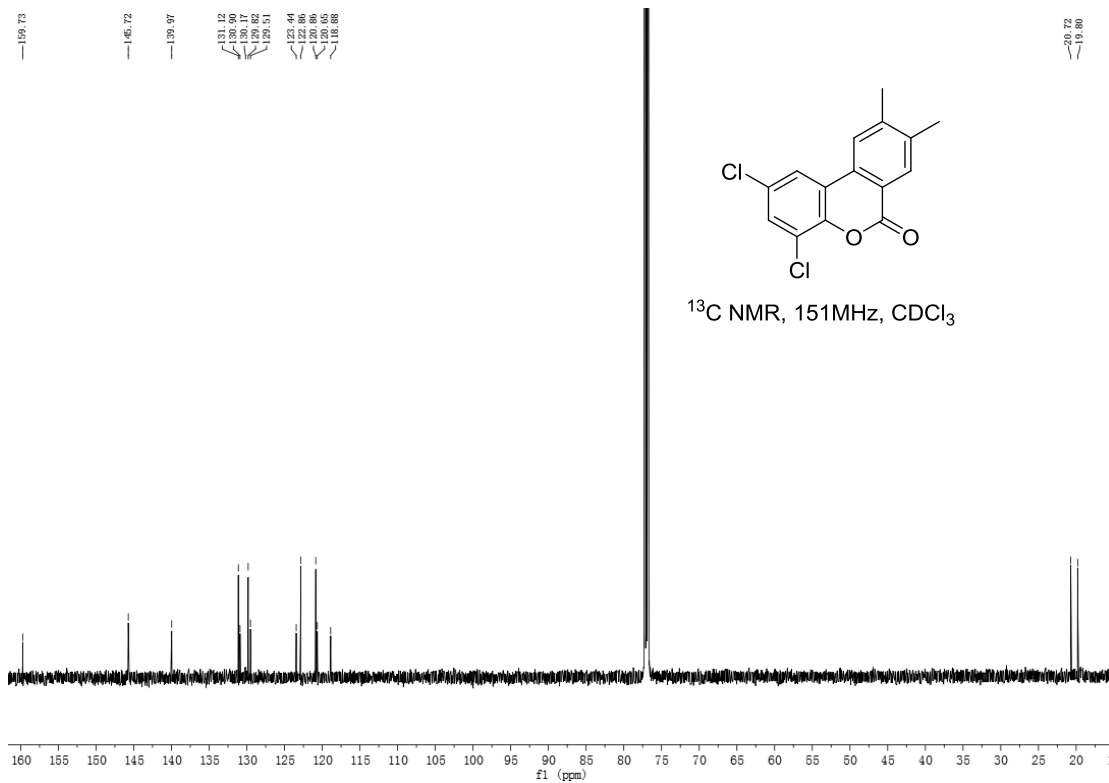

**ii**

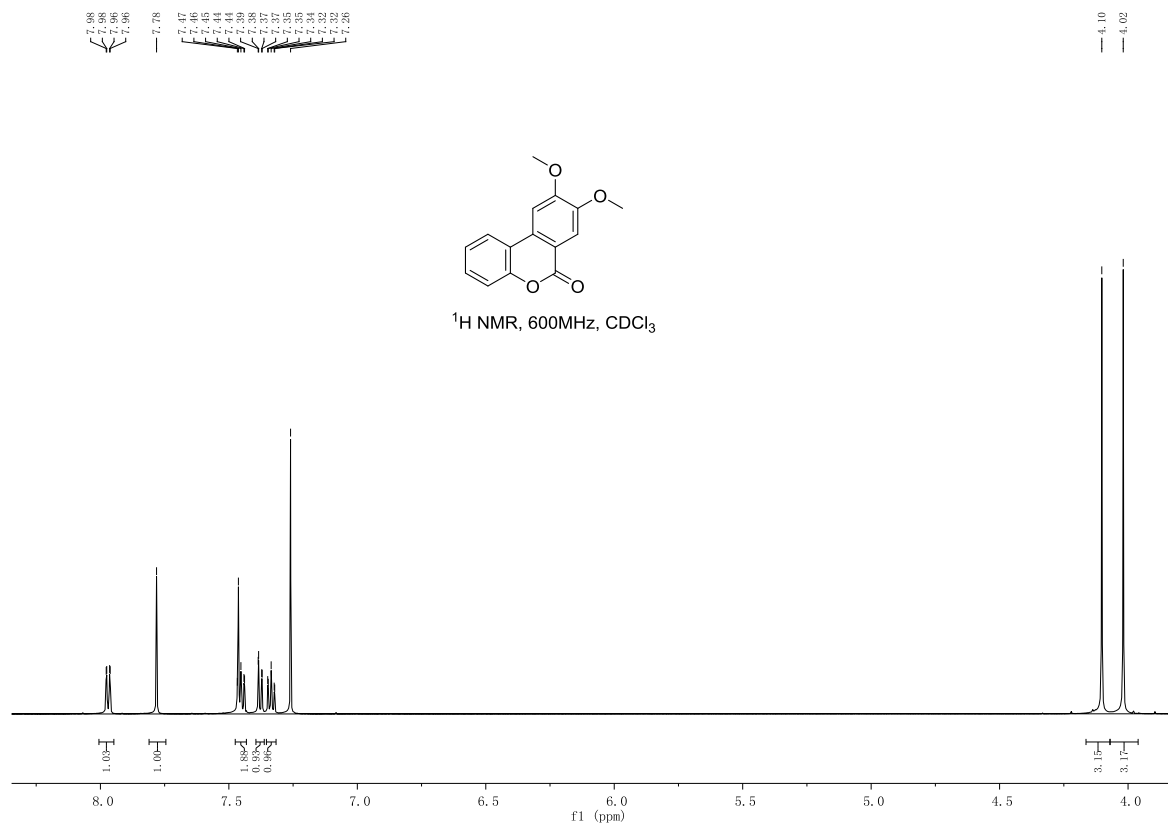

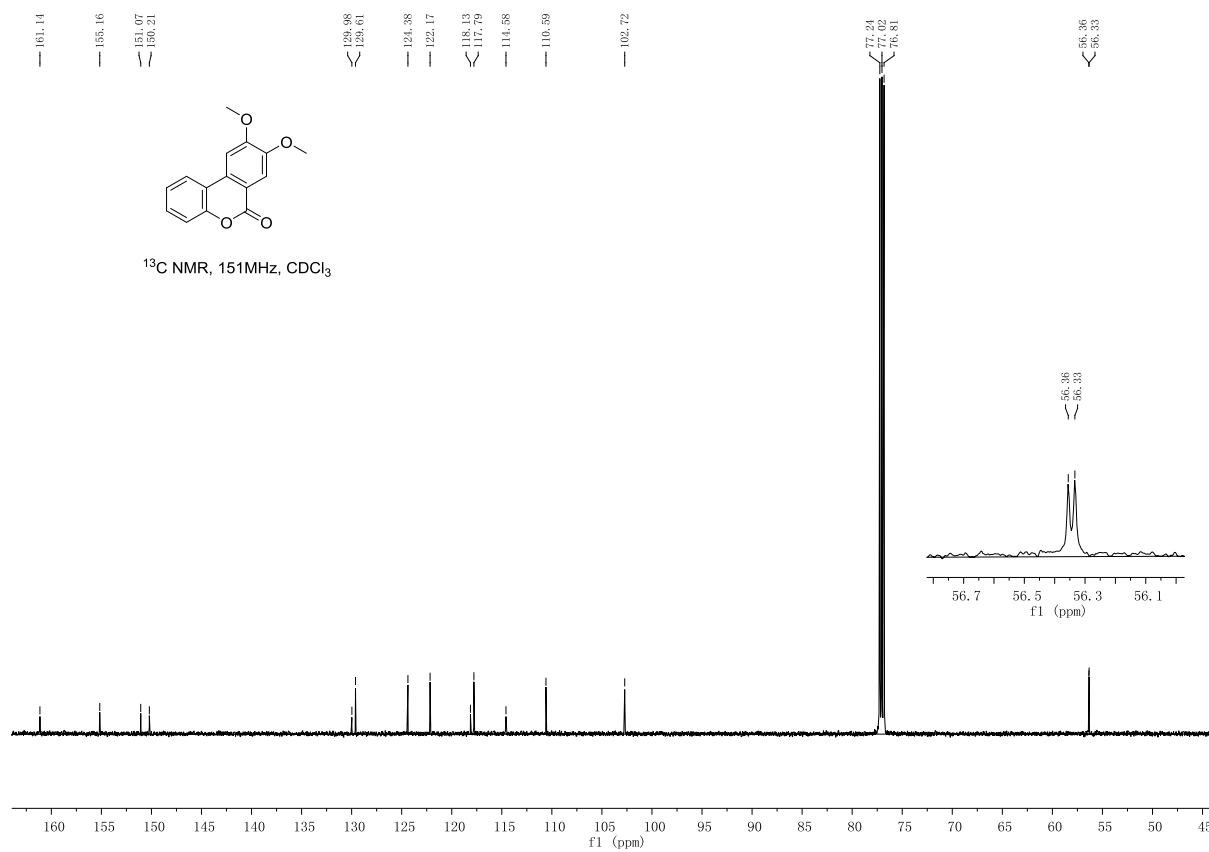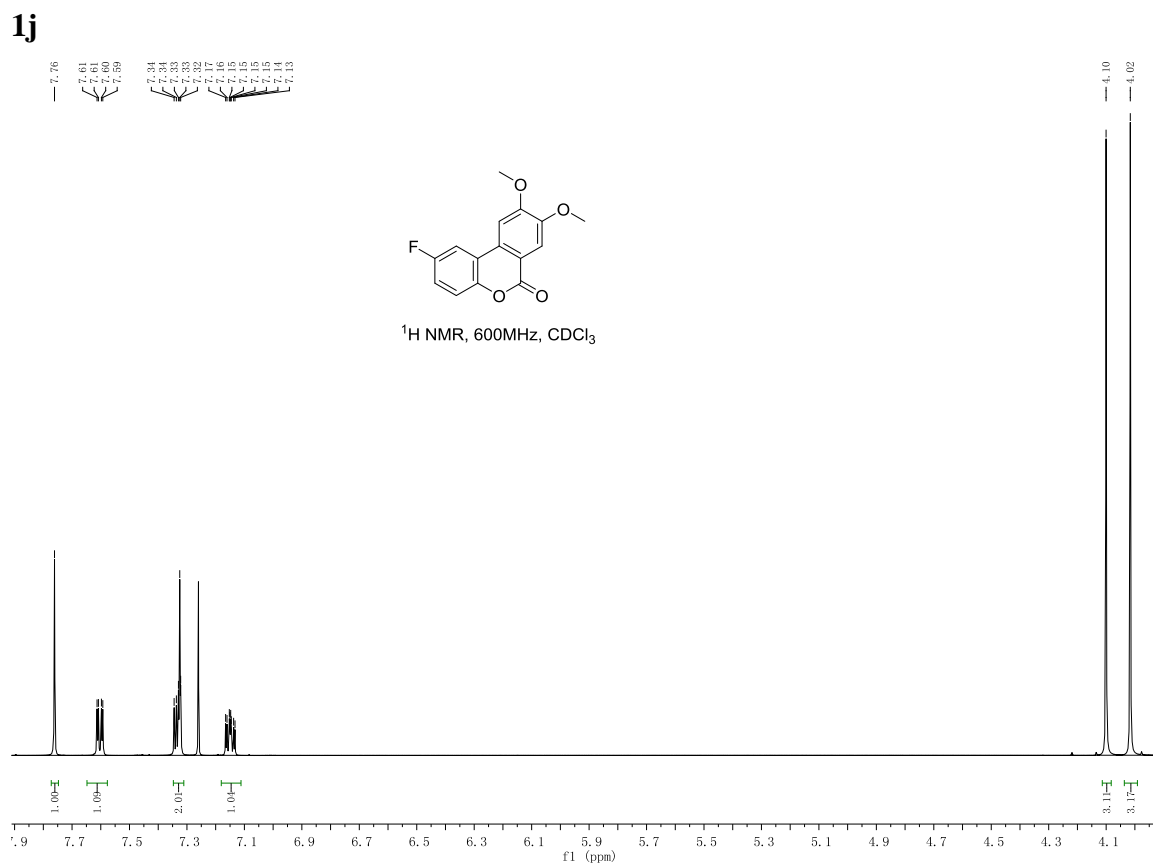





1k

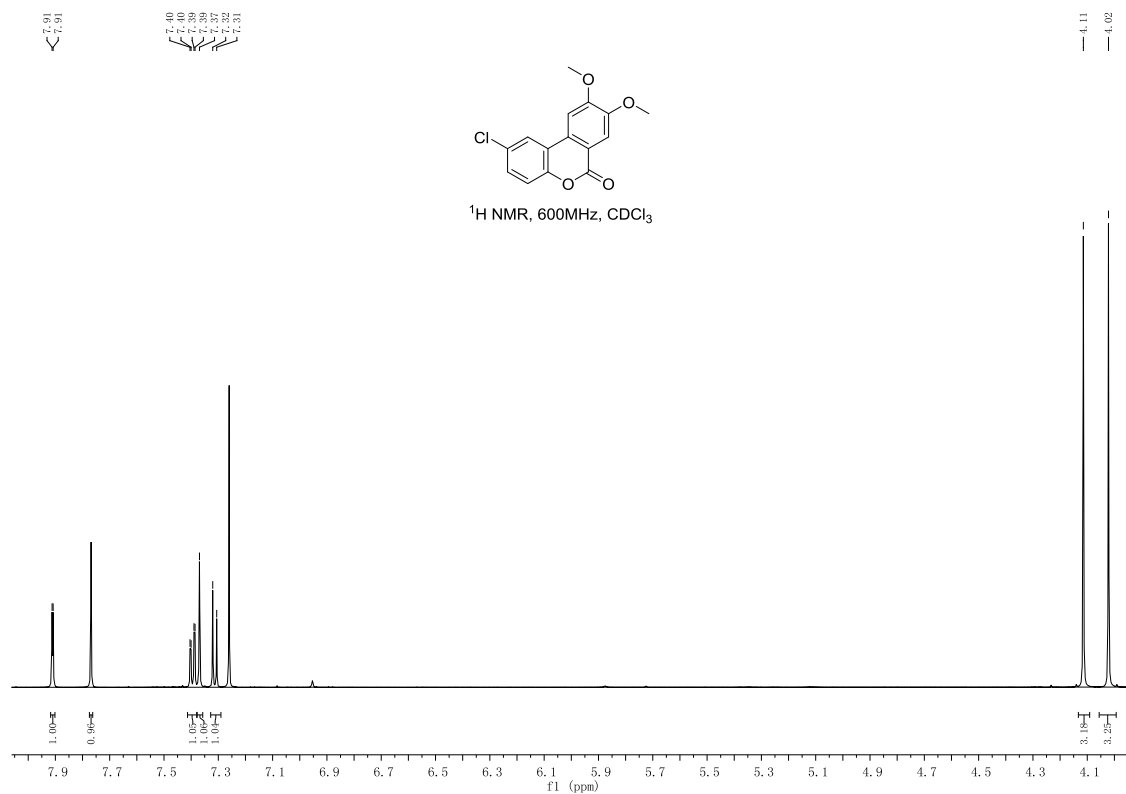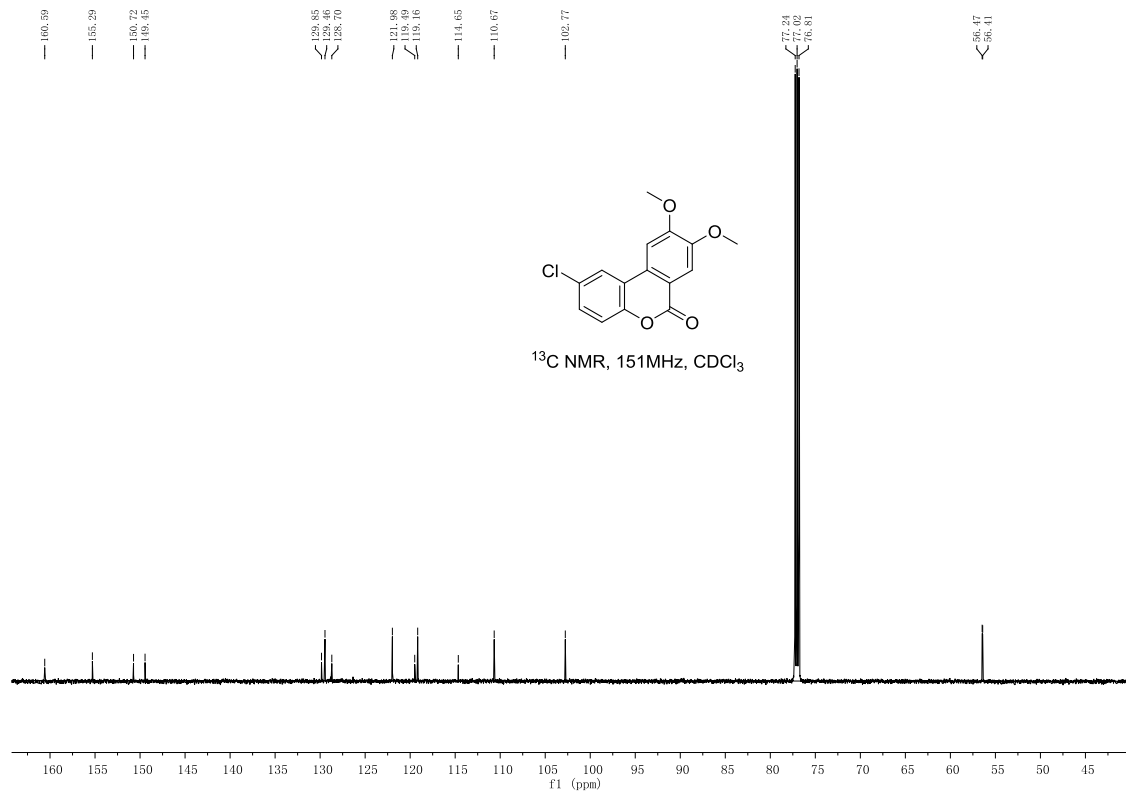

11

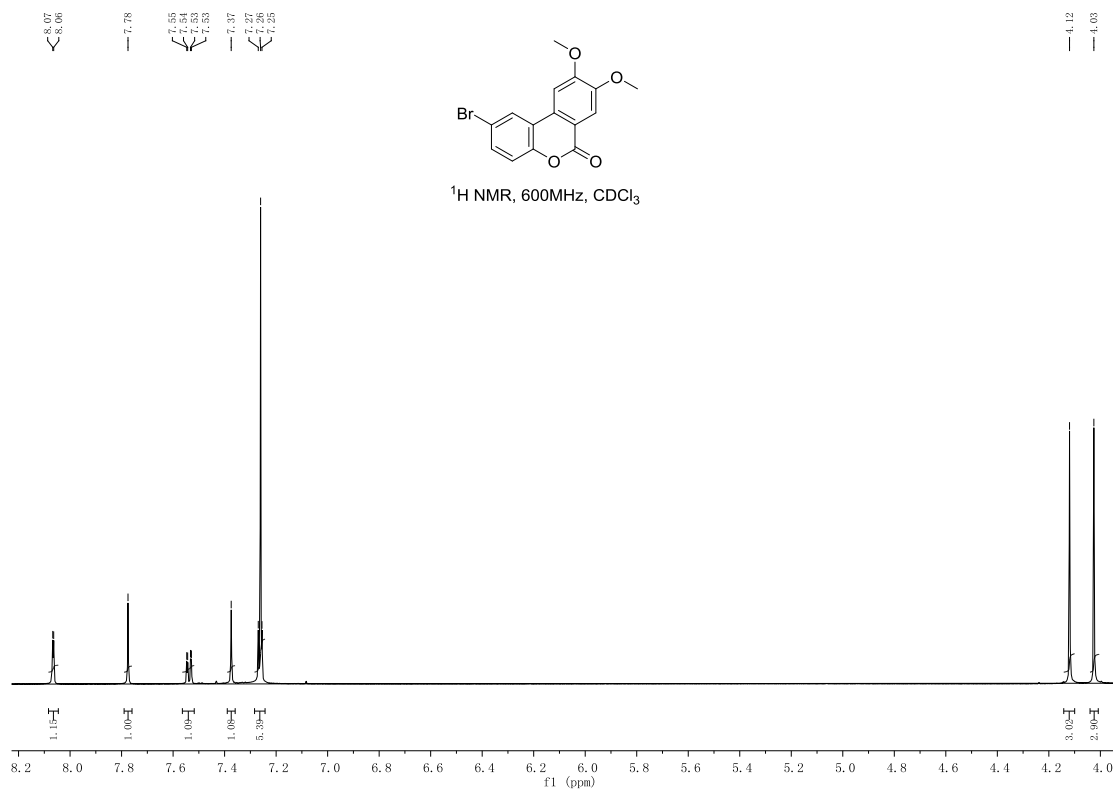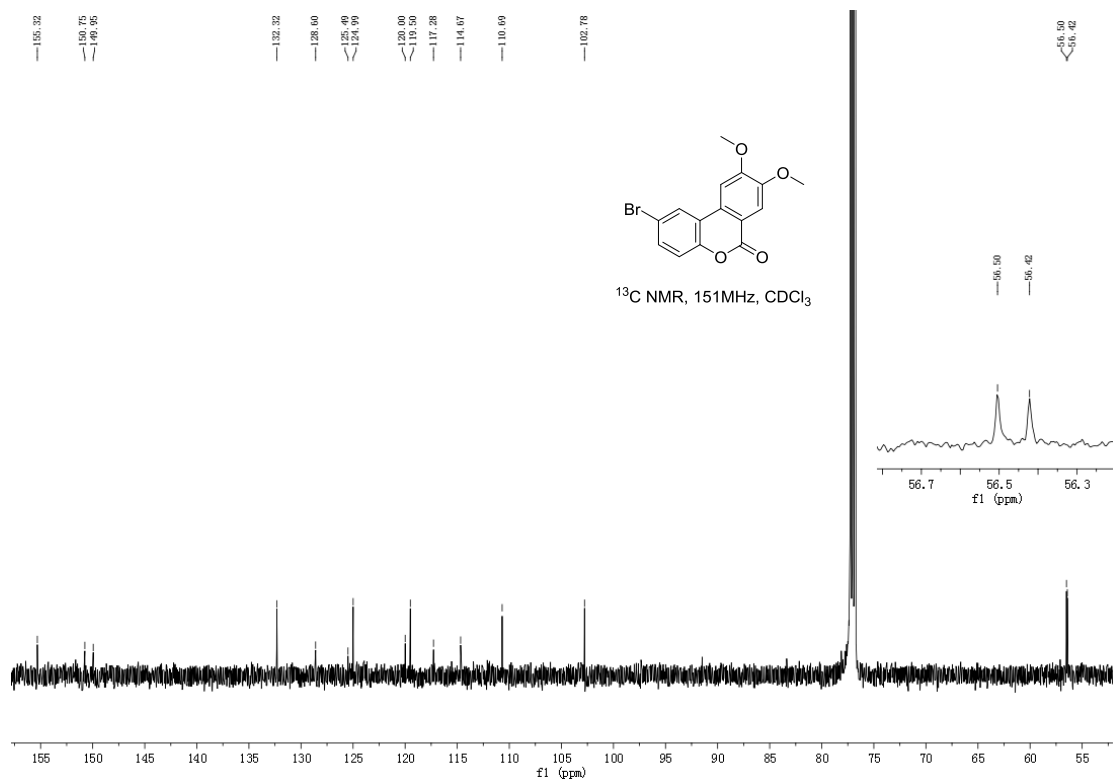

1m

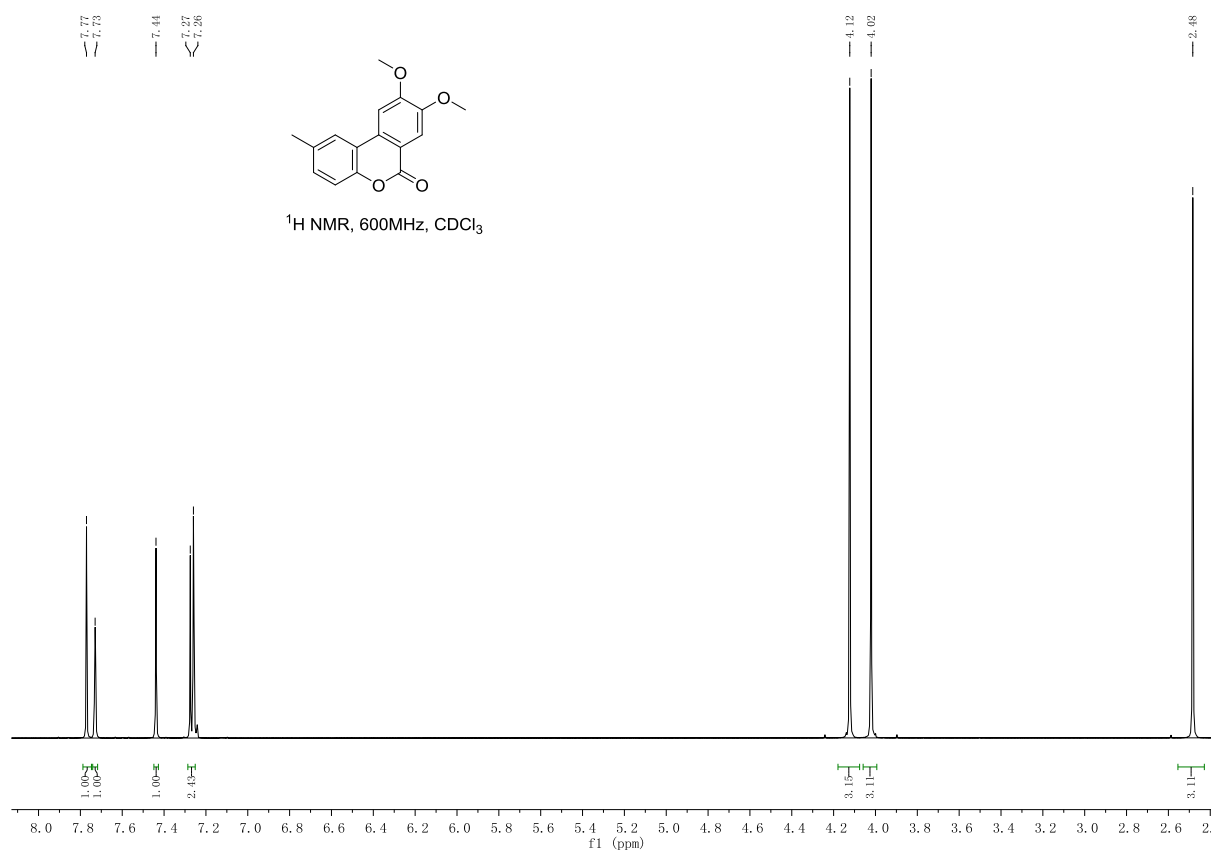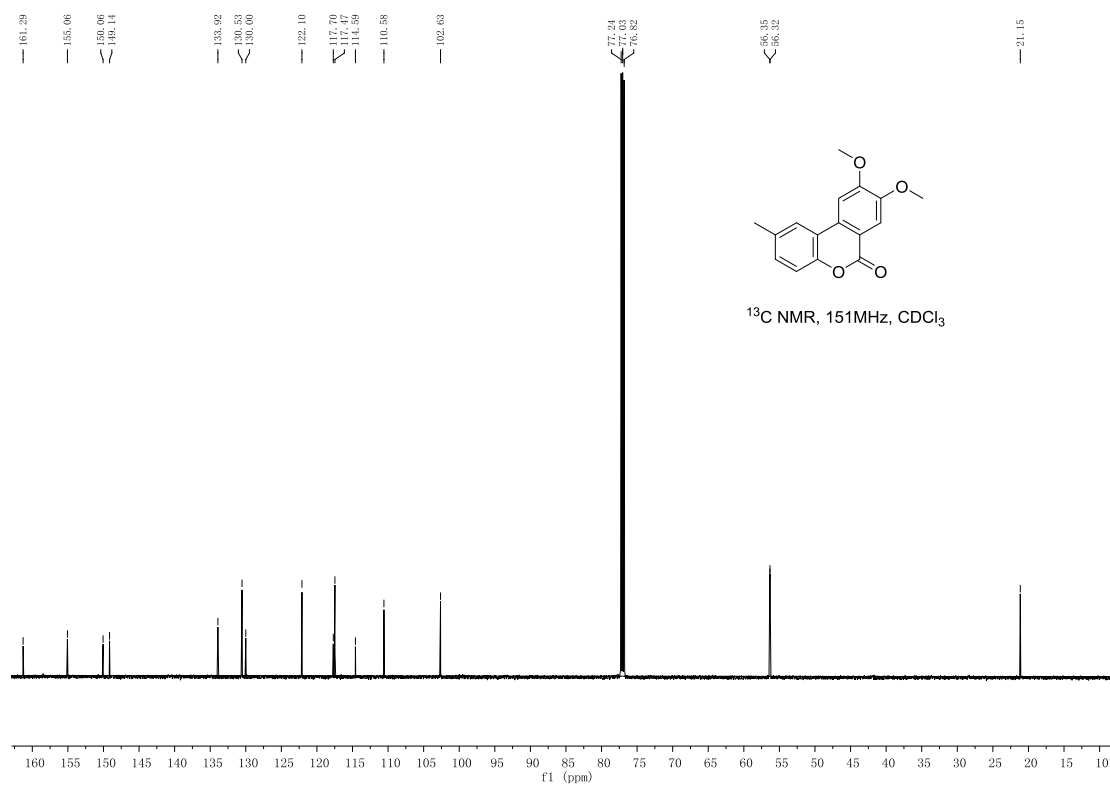

**1n**

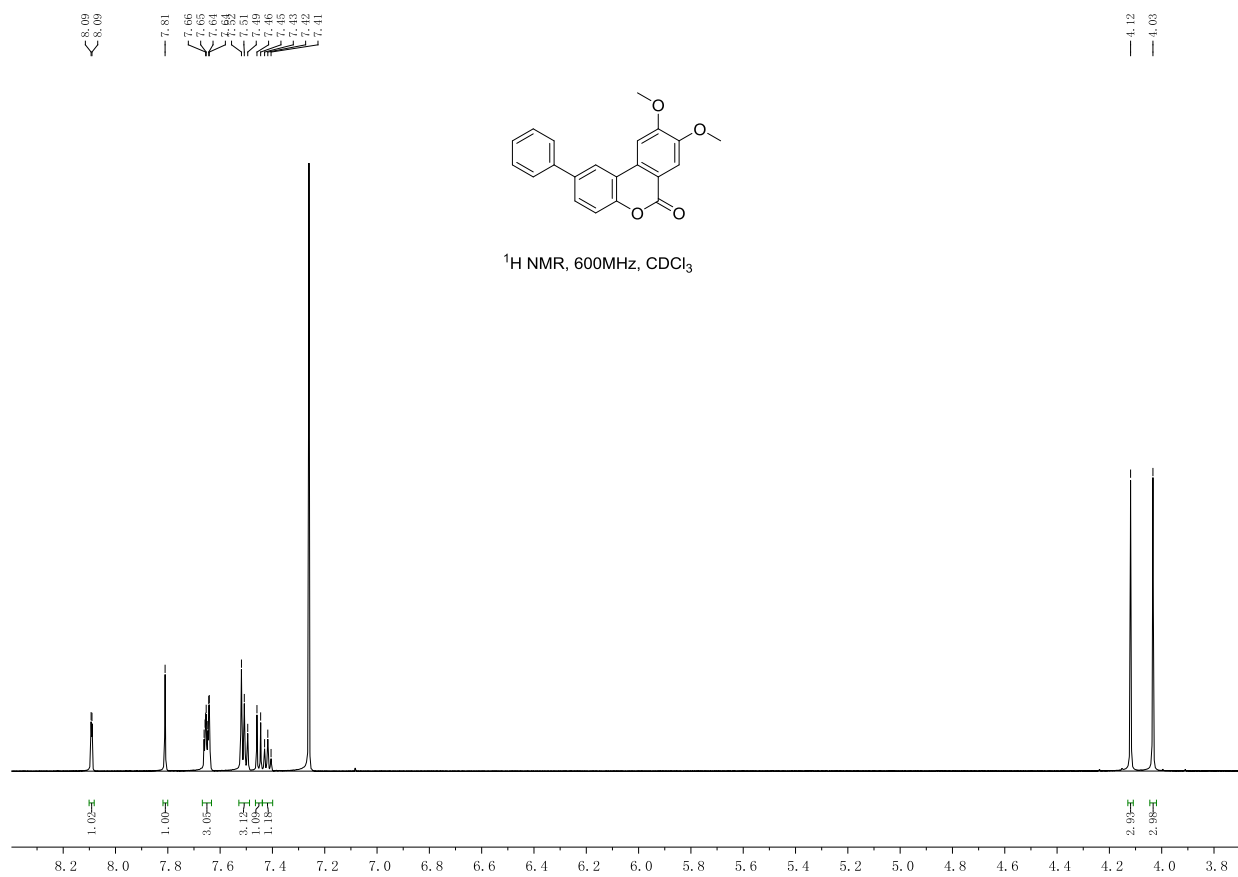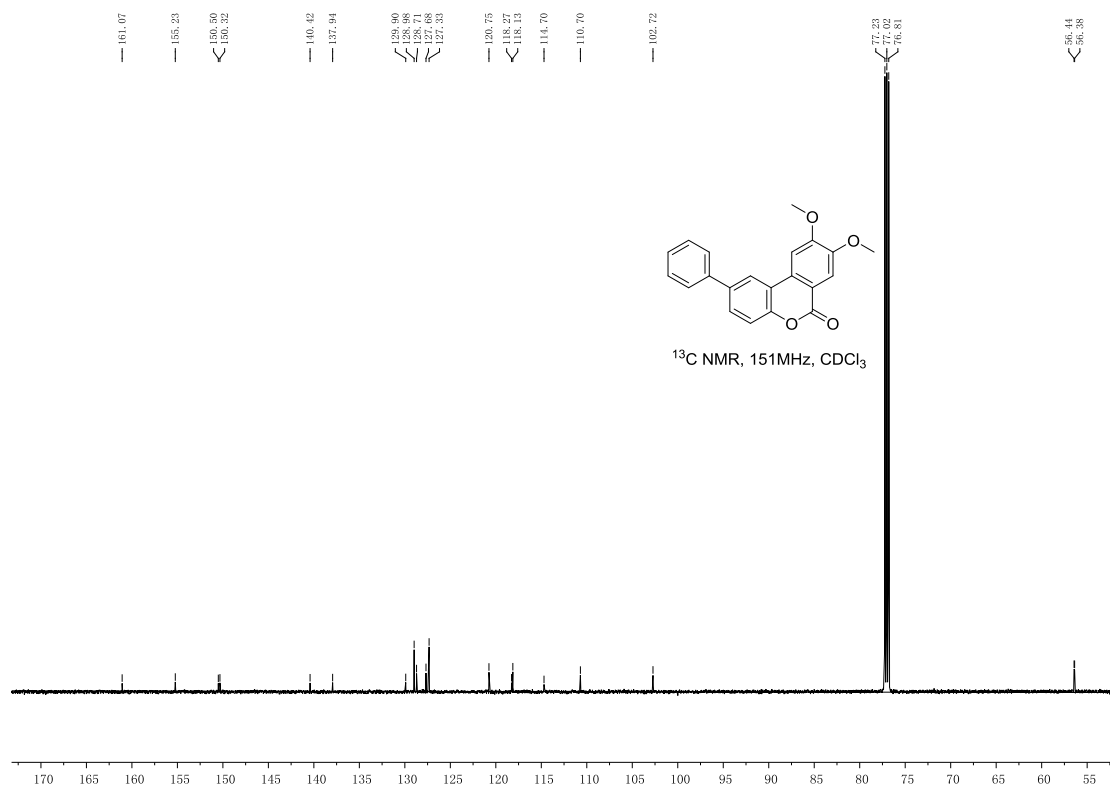

10

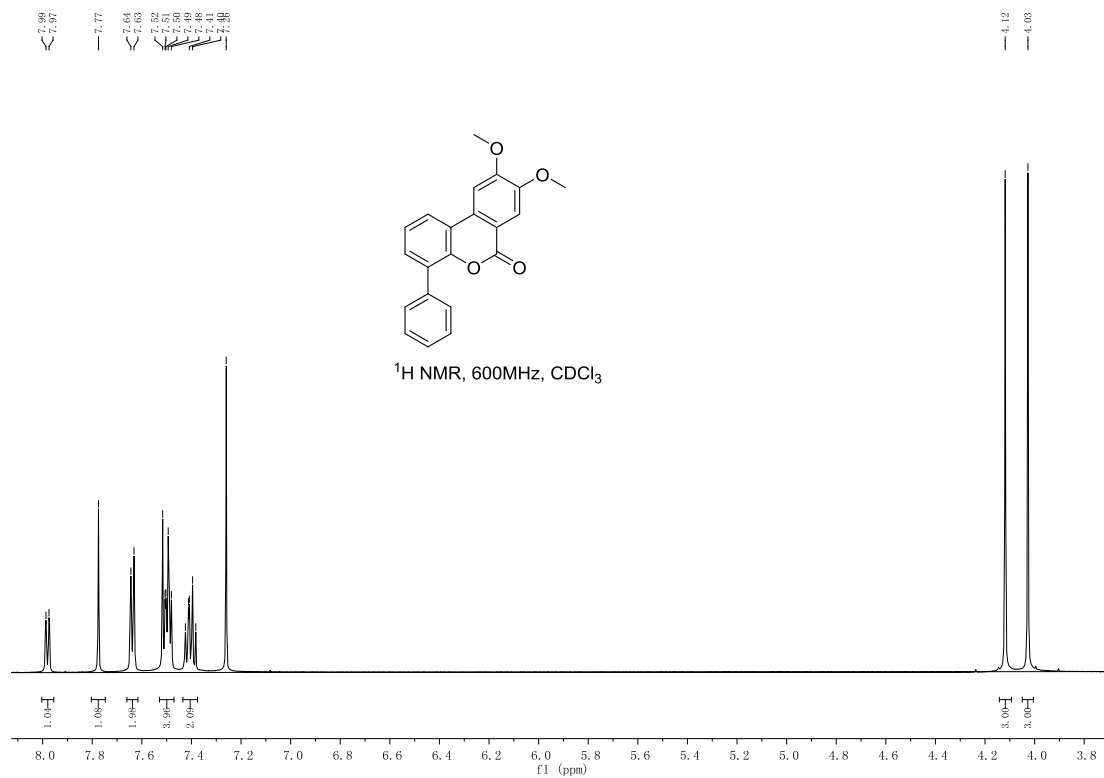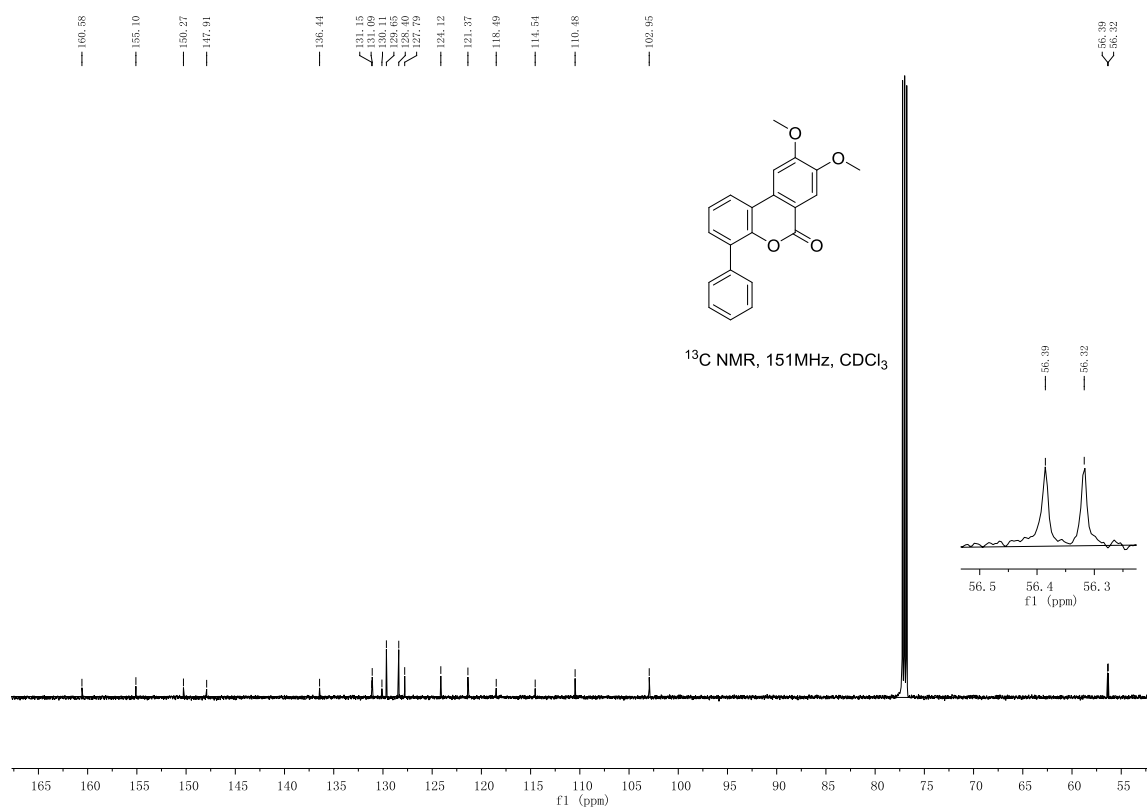

1p

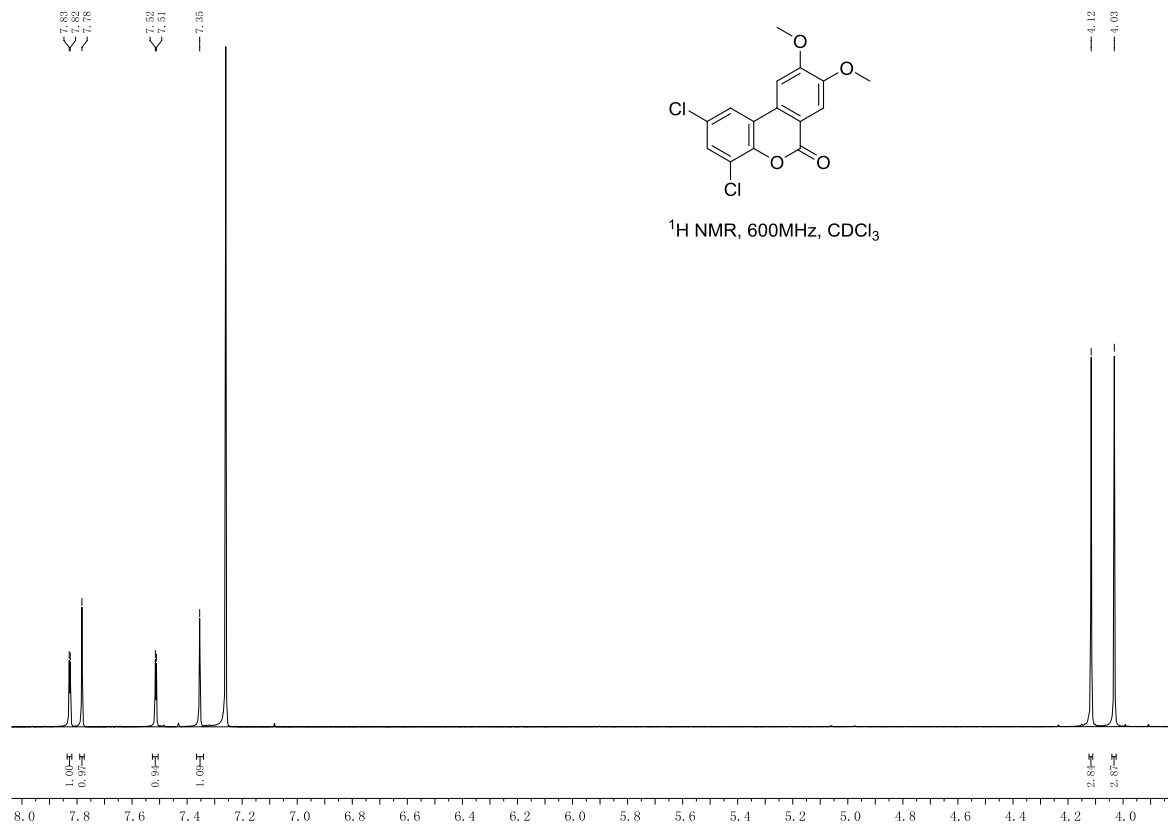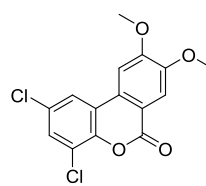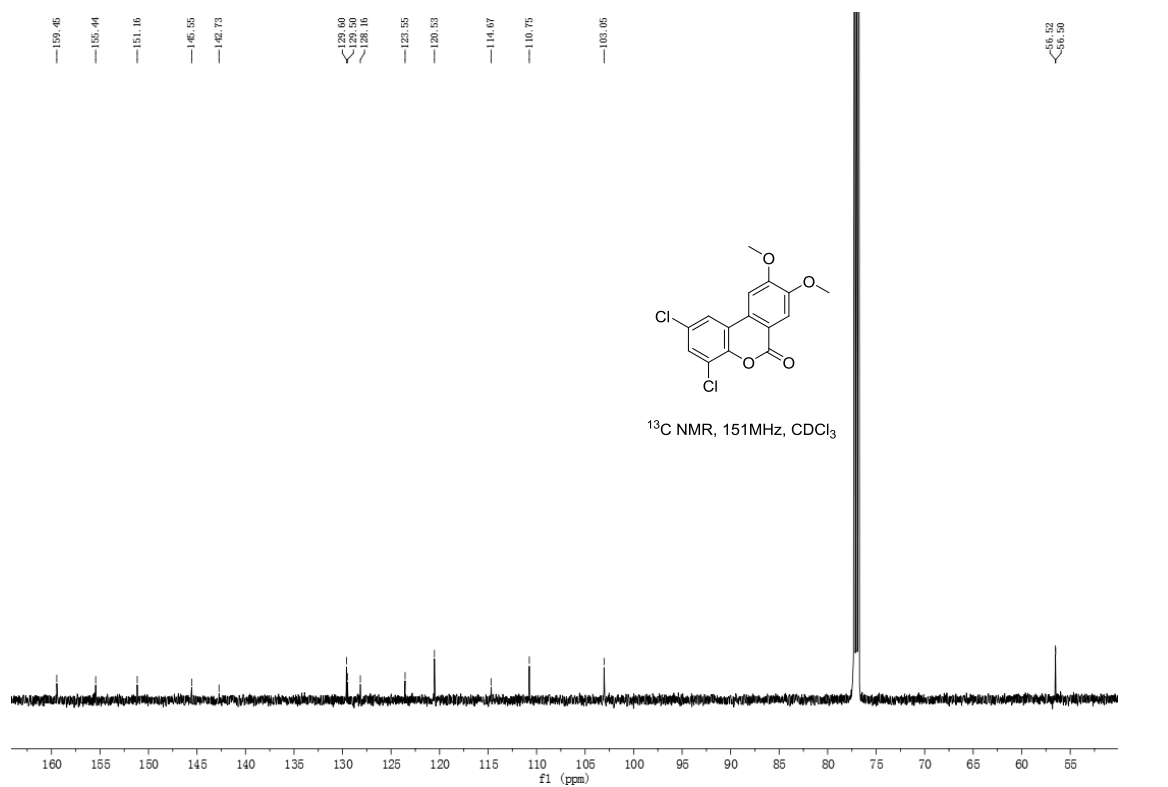

1q

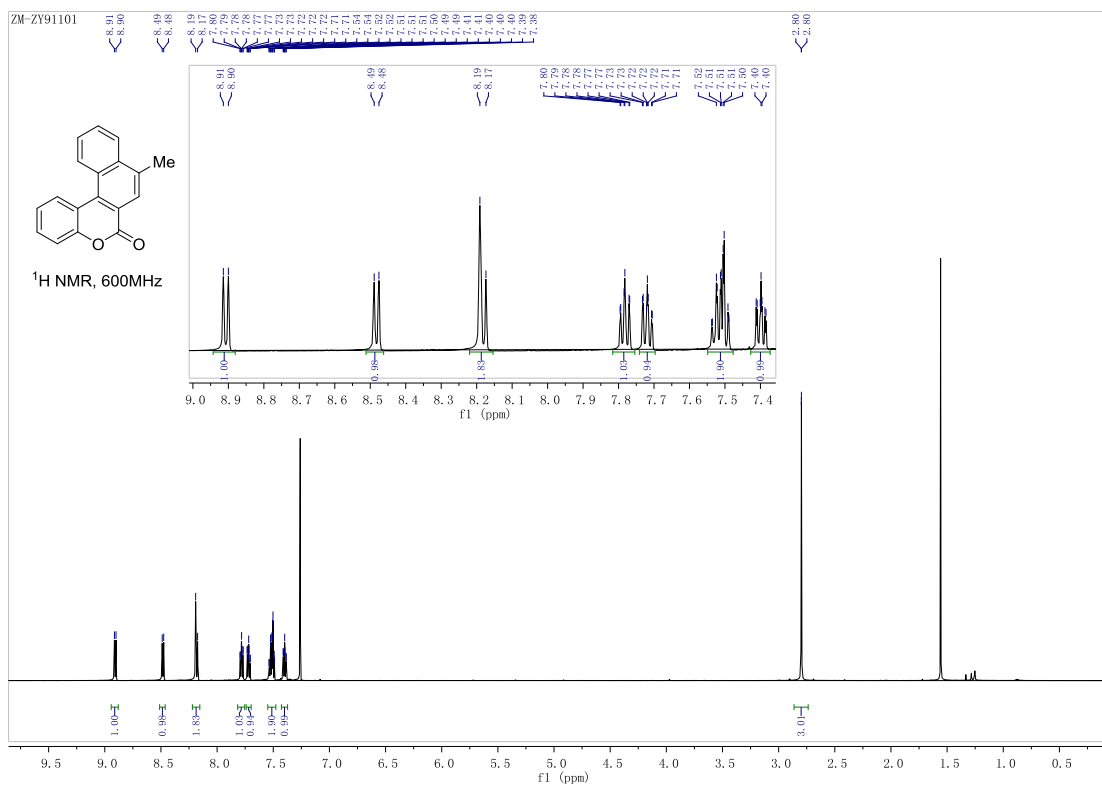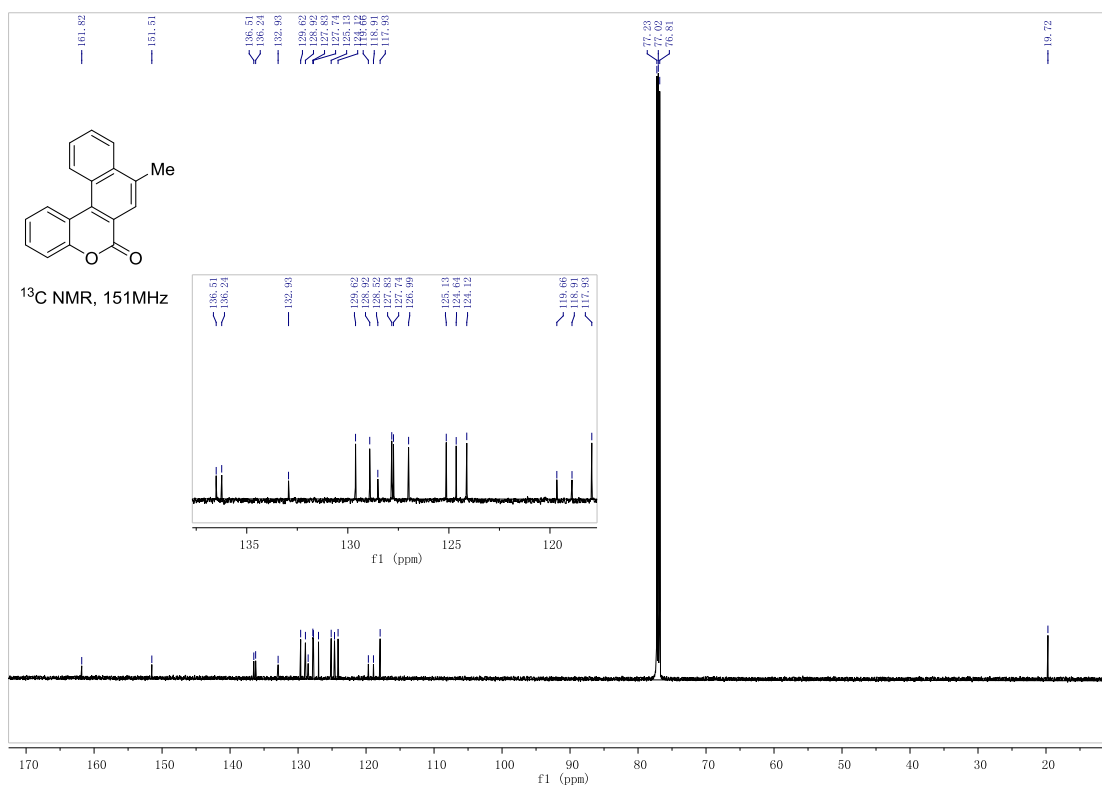

4a

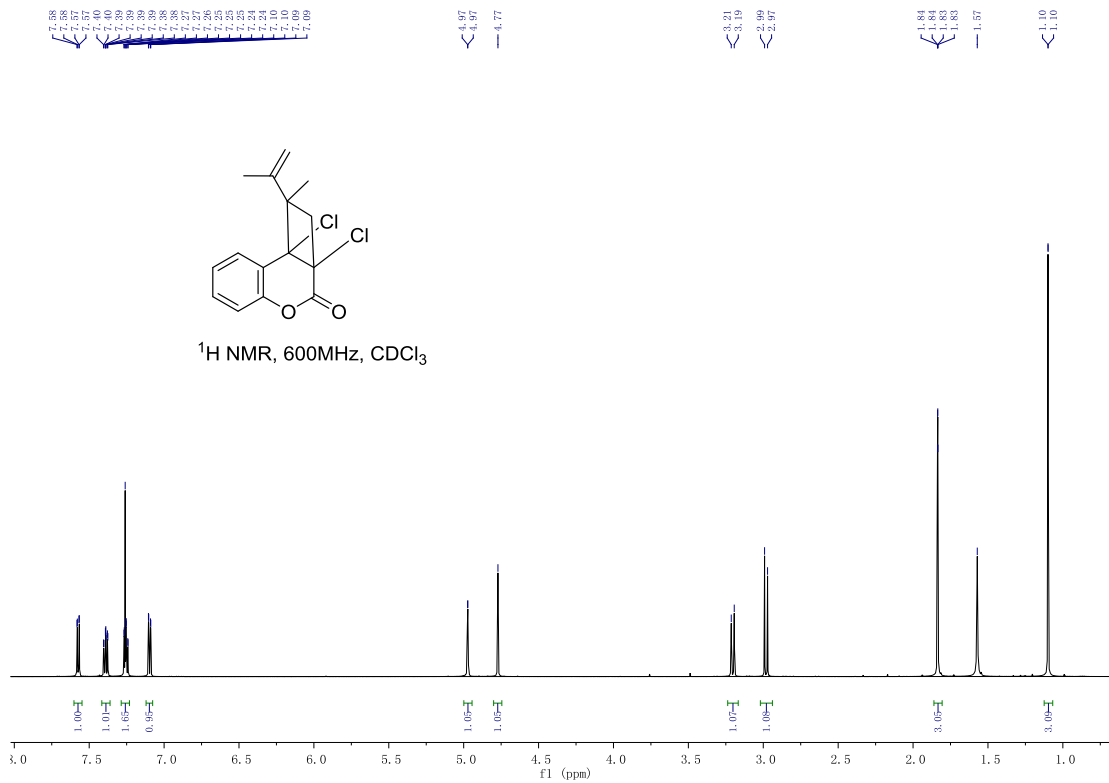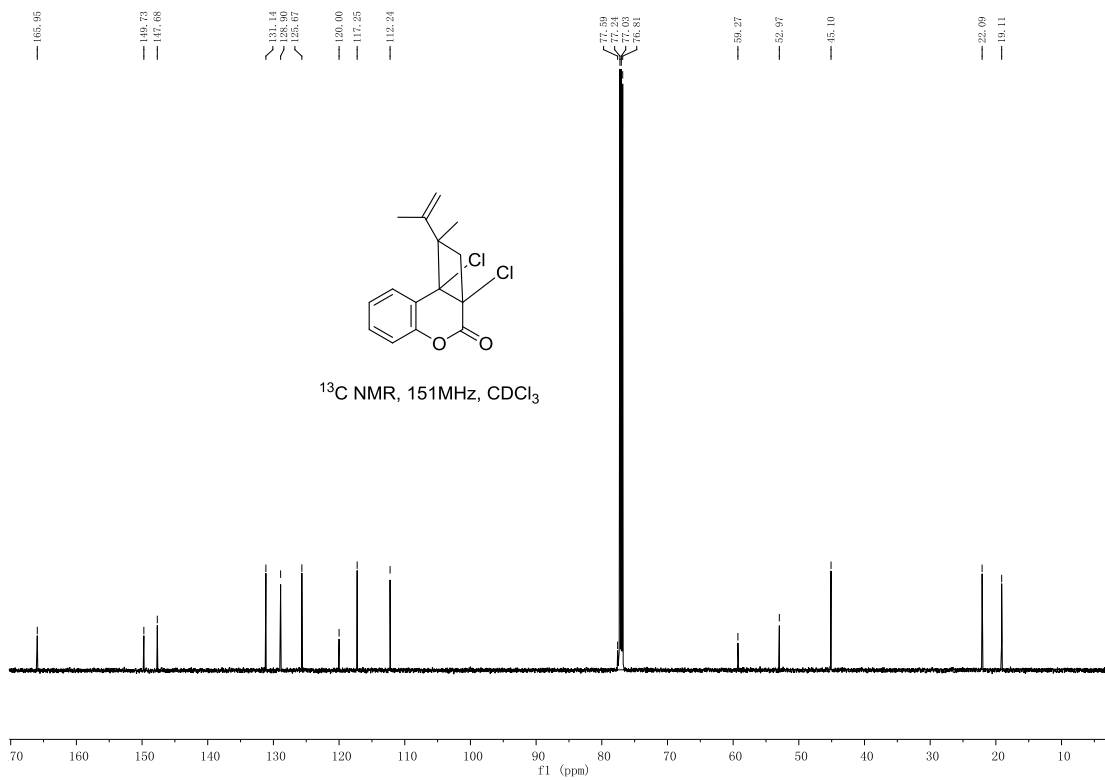



4b

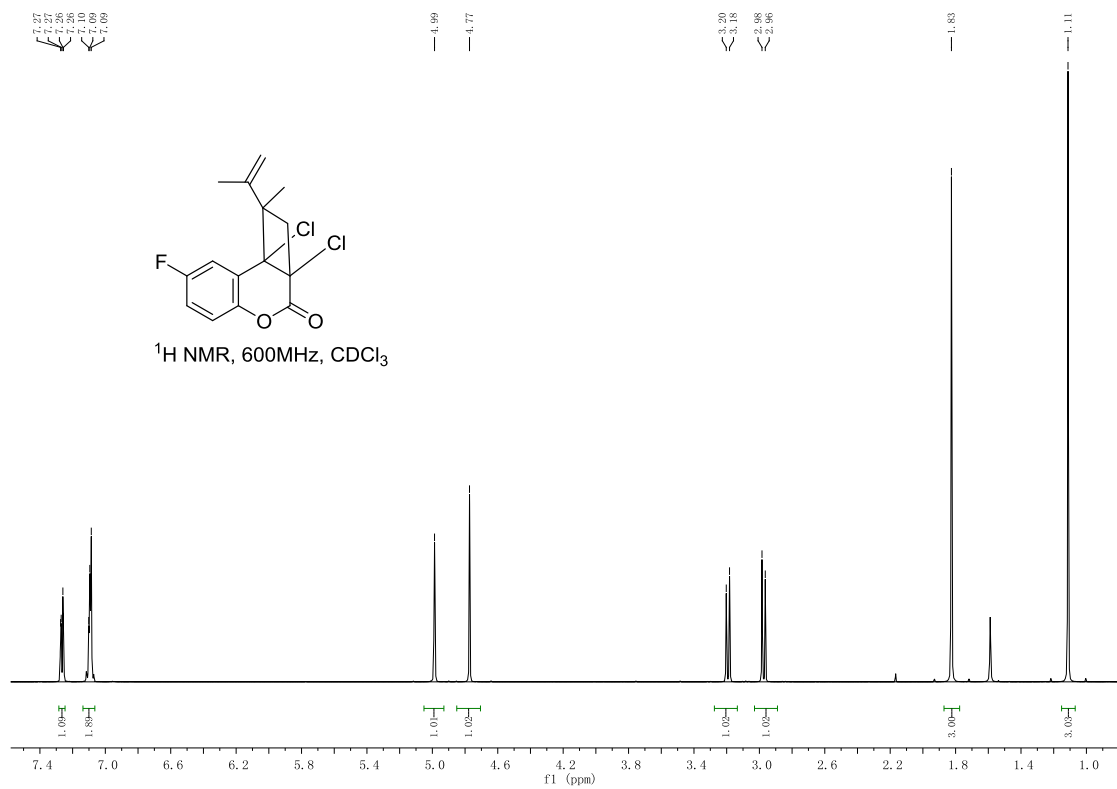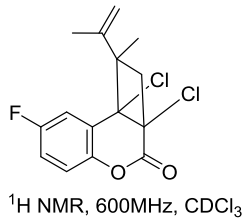

<sup>13</sup>C NMR

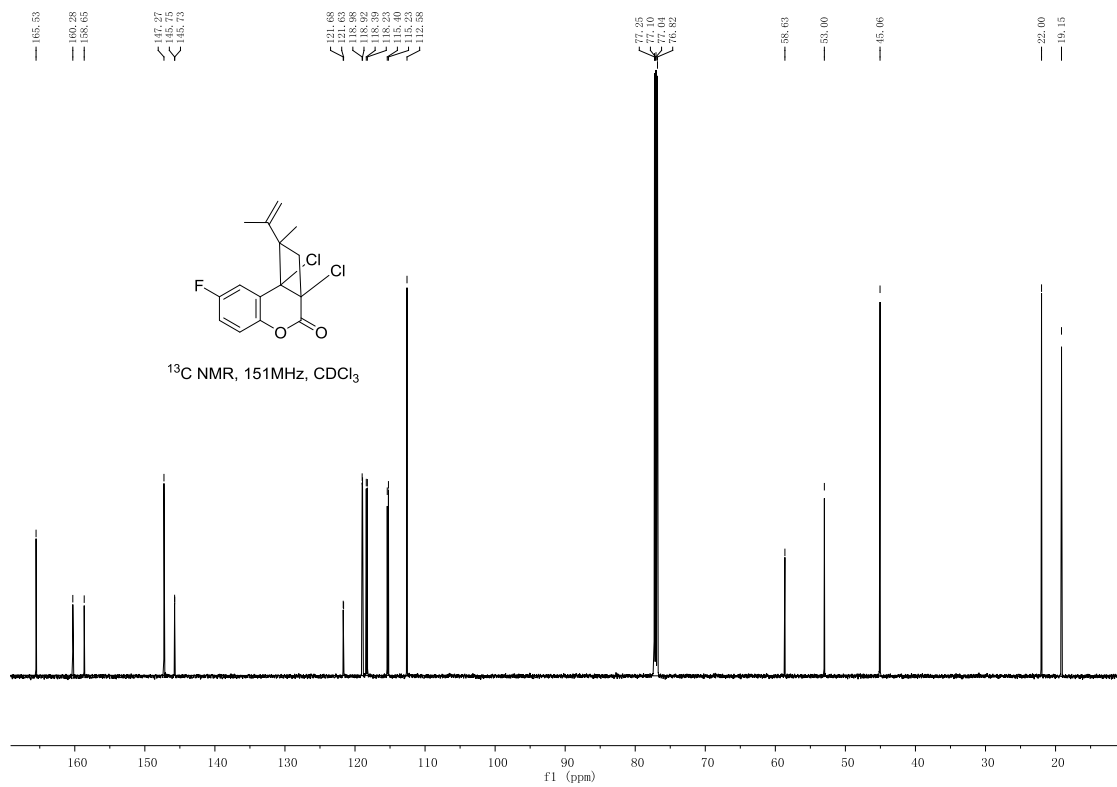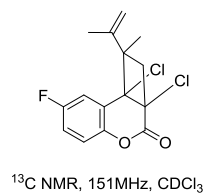

<sup>19</sup>F NMR

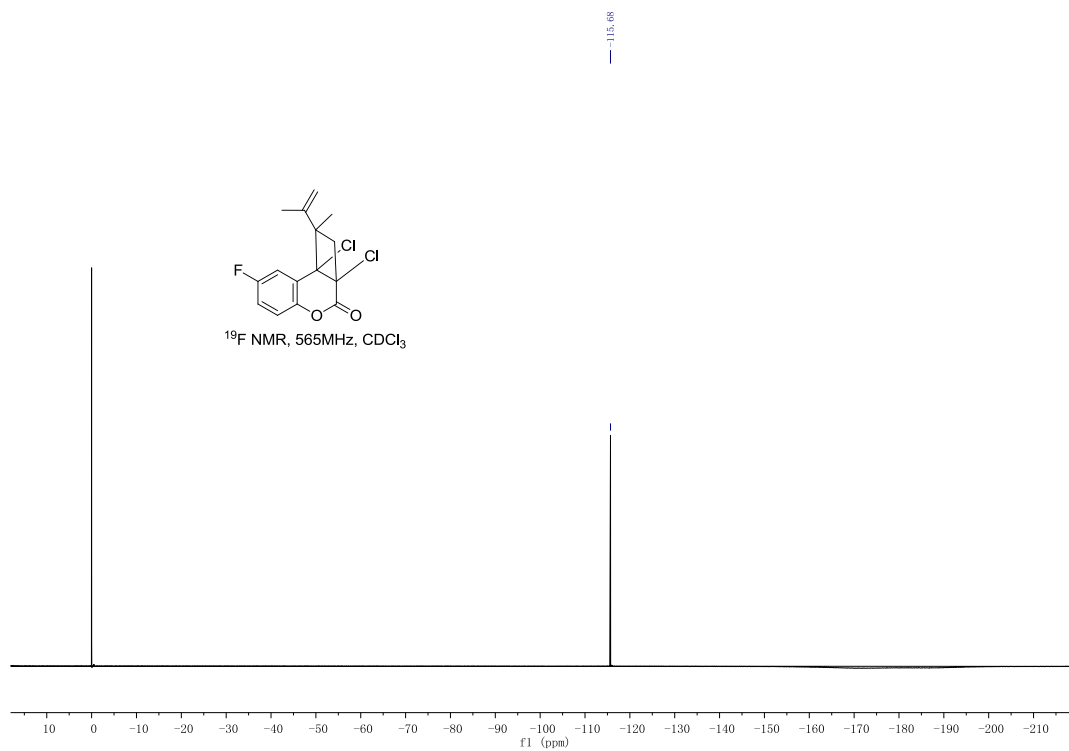

4c

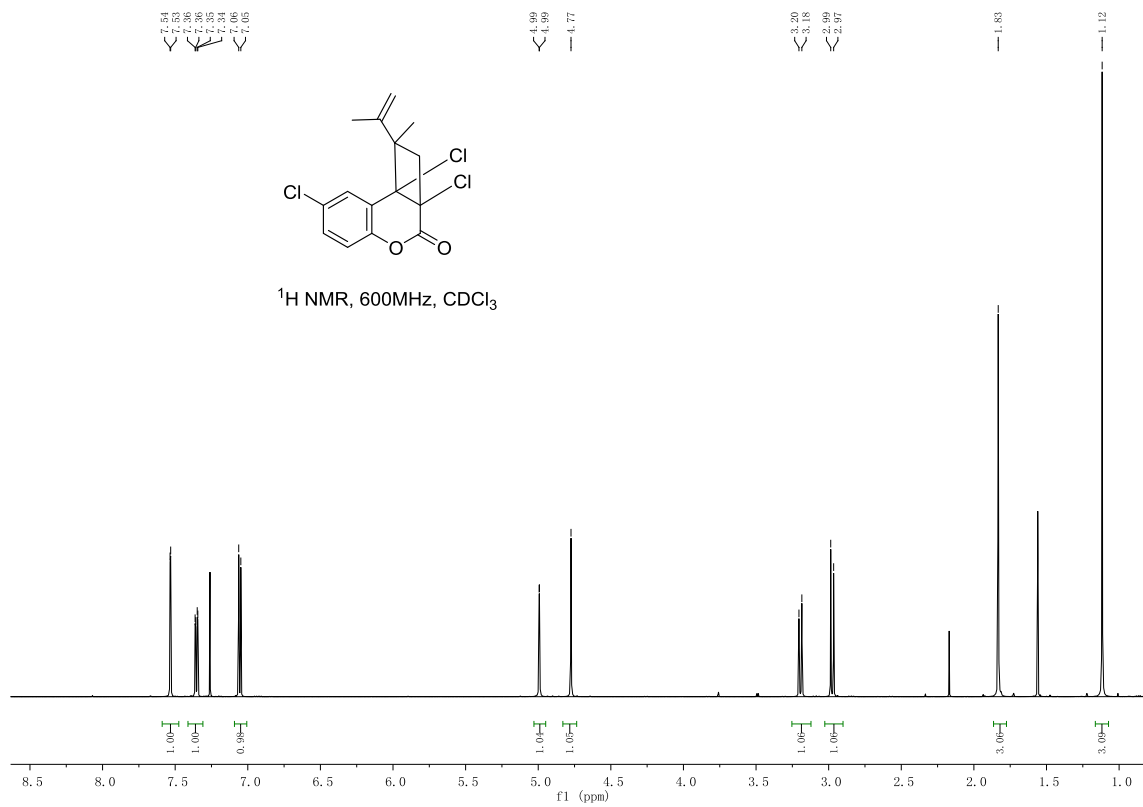

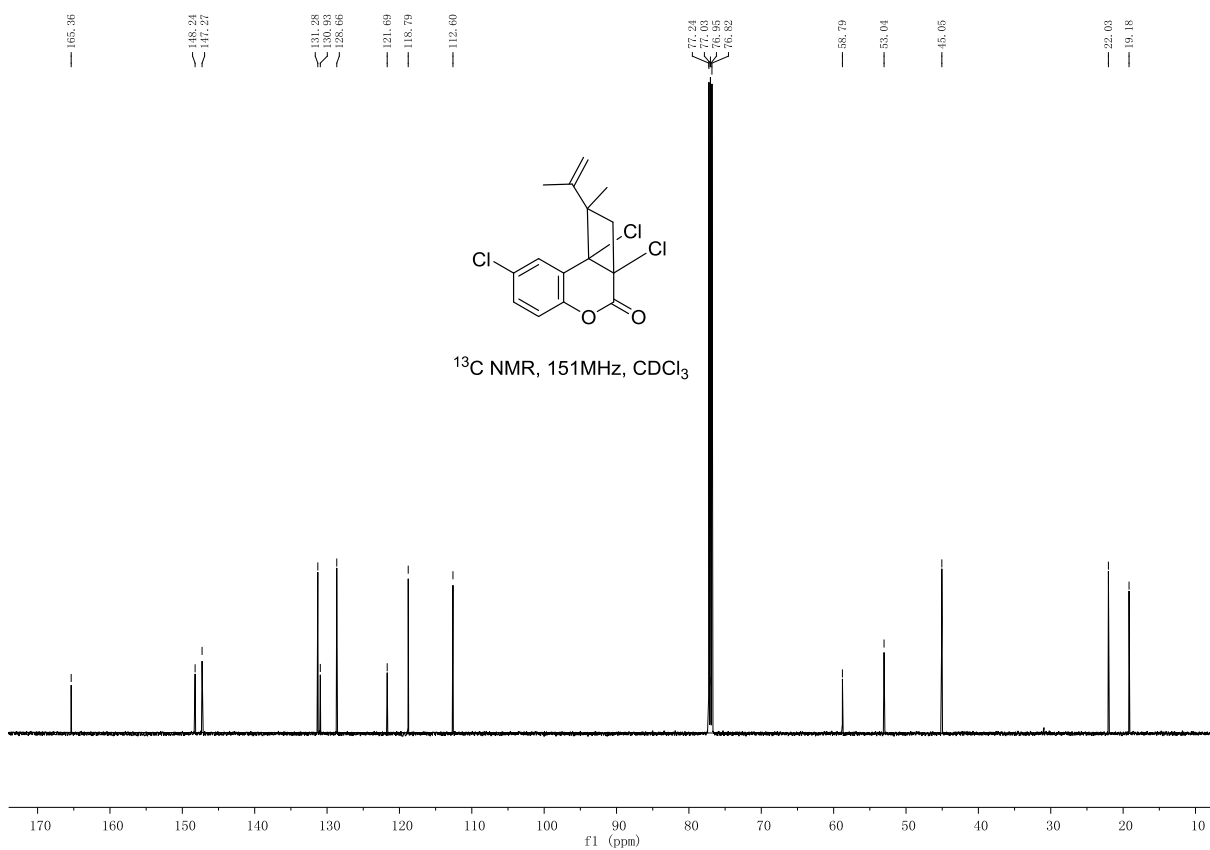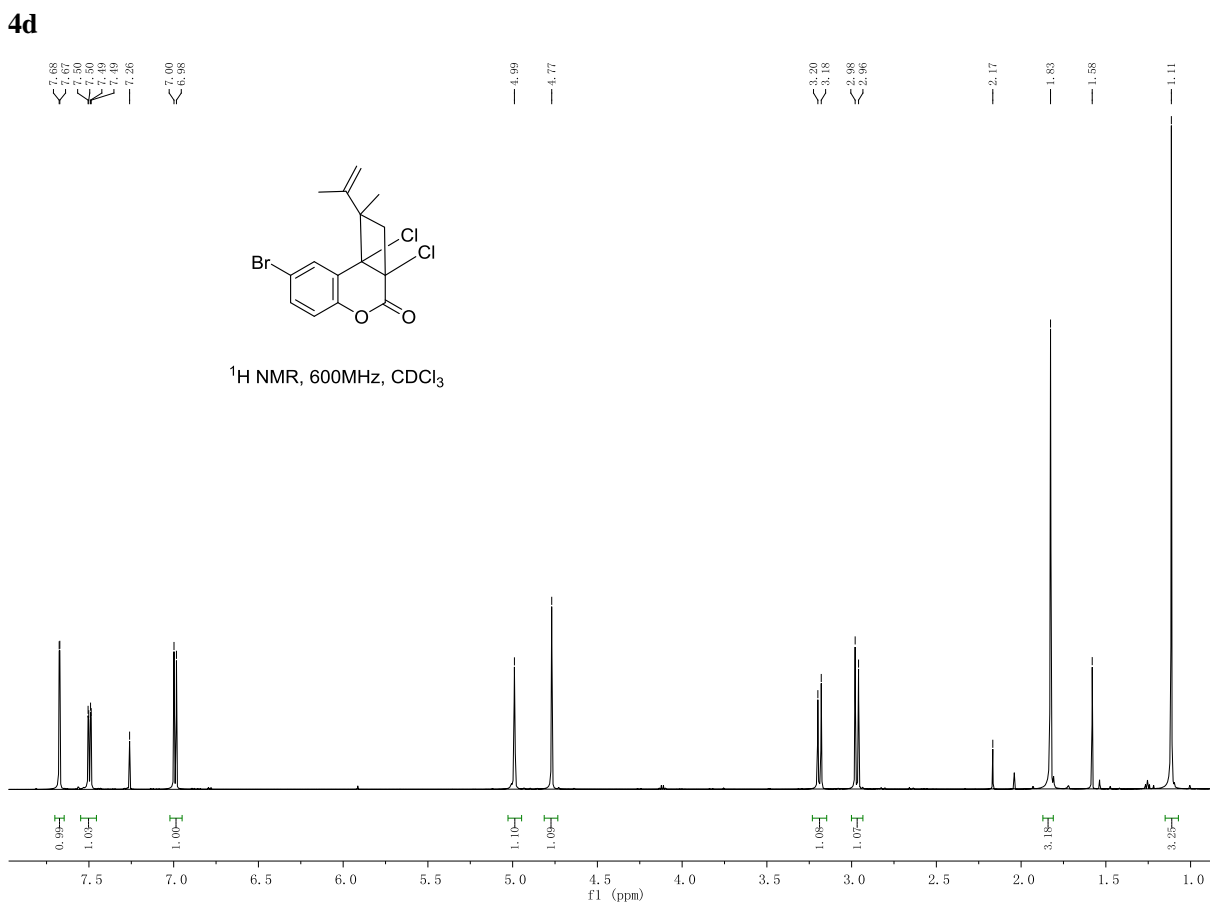

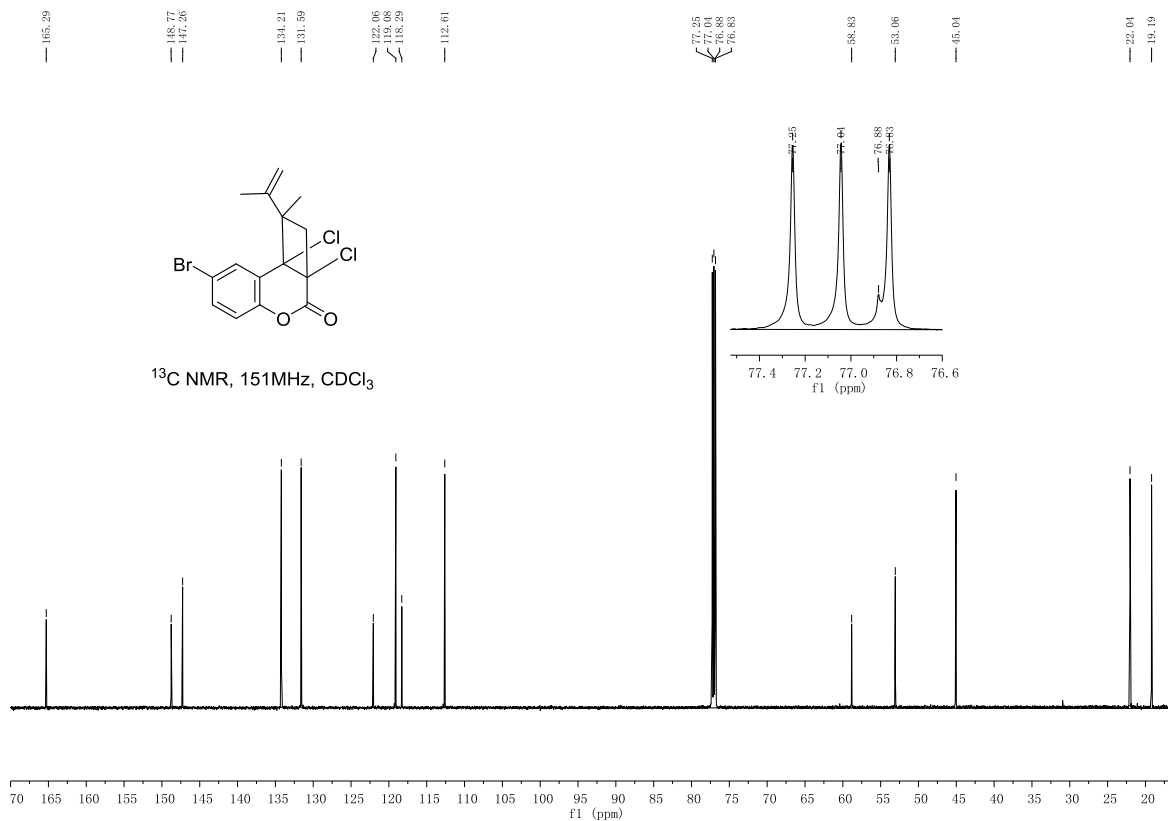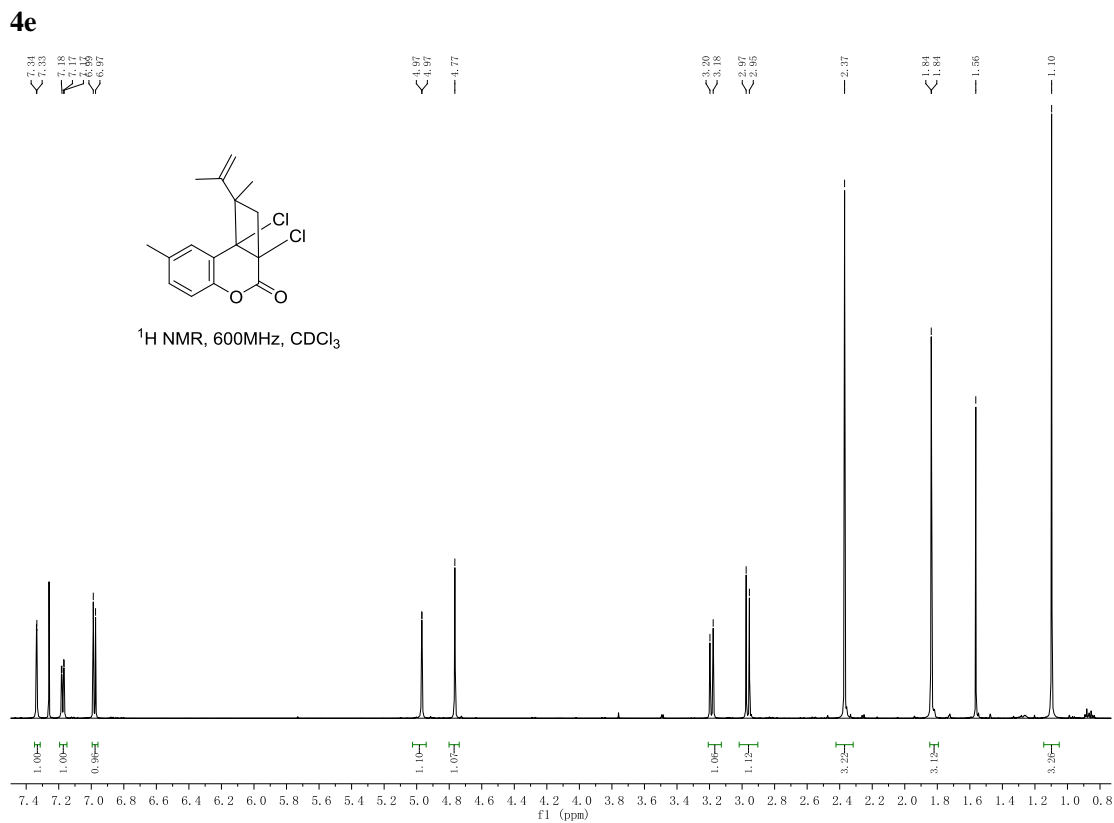

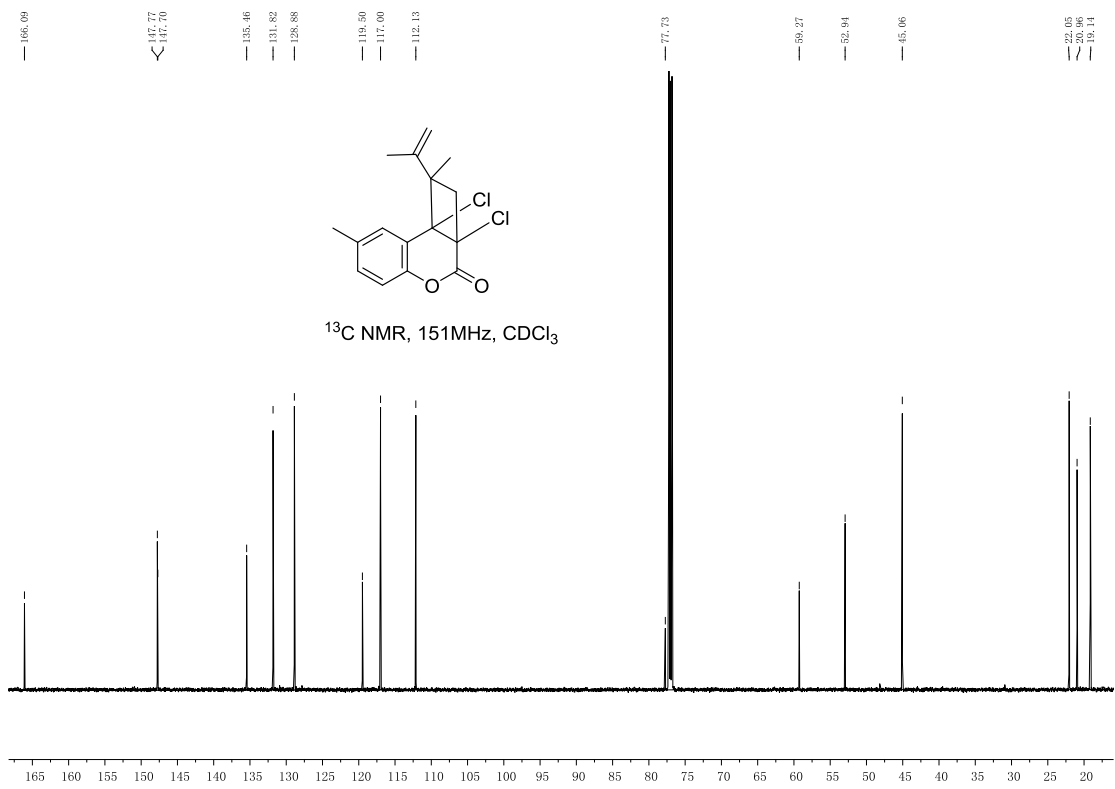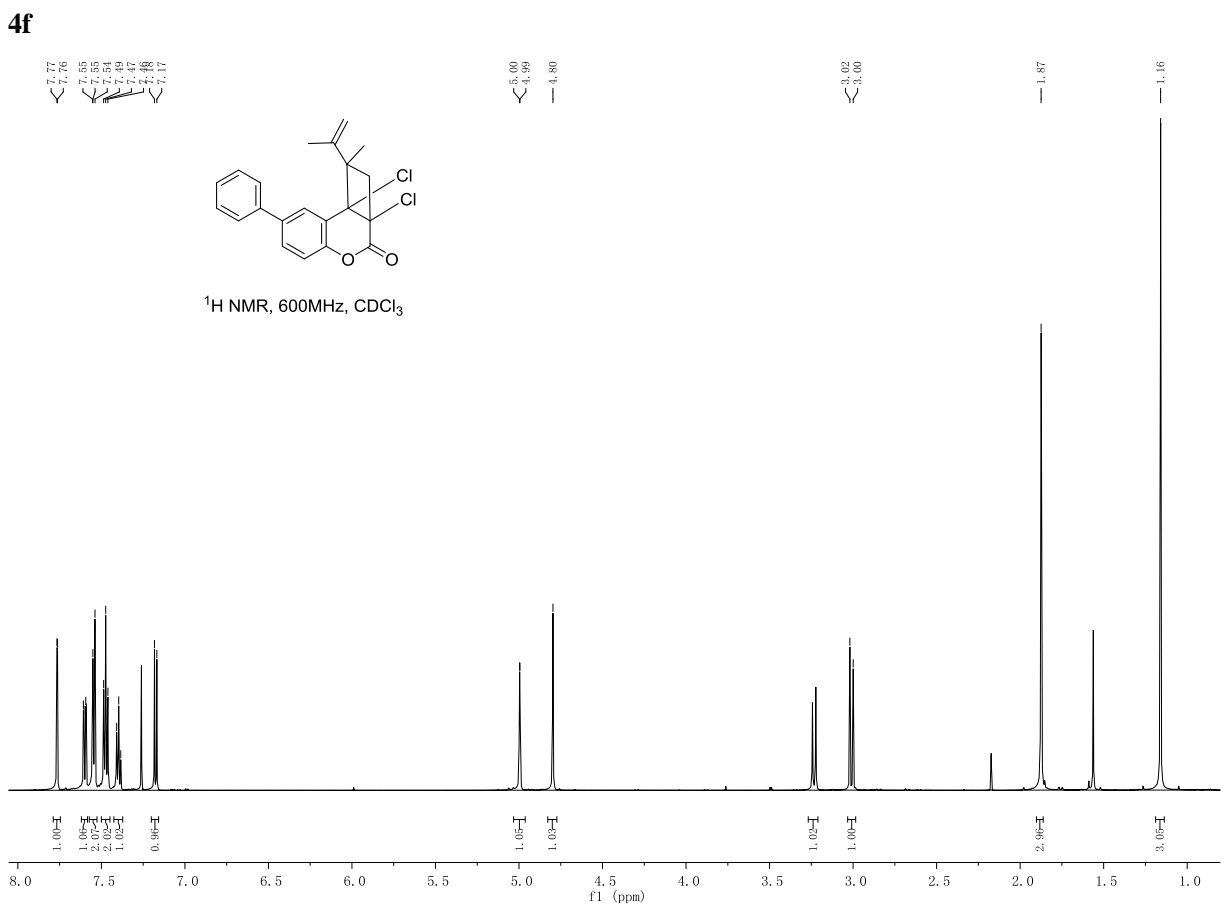

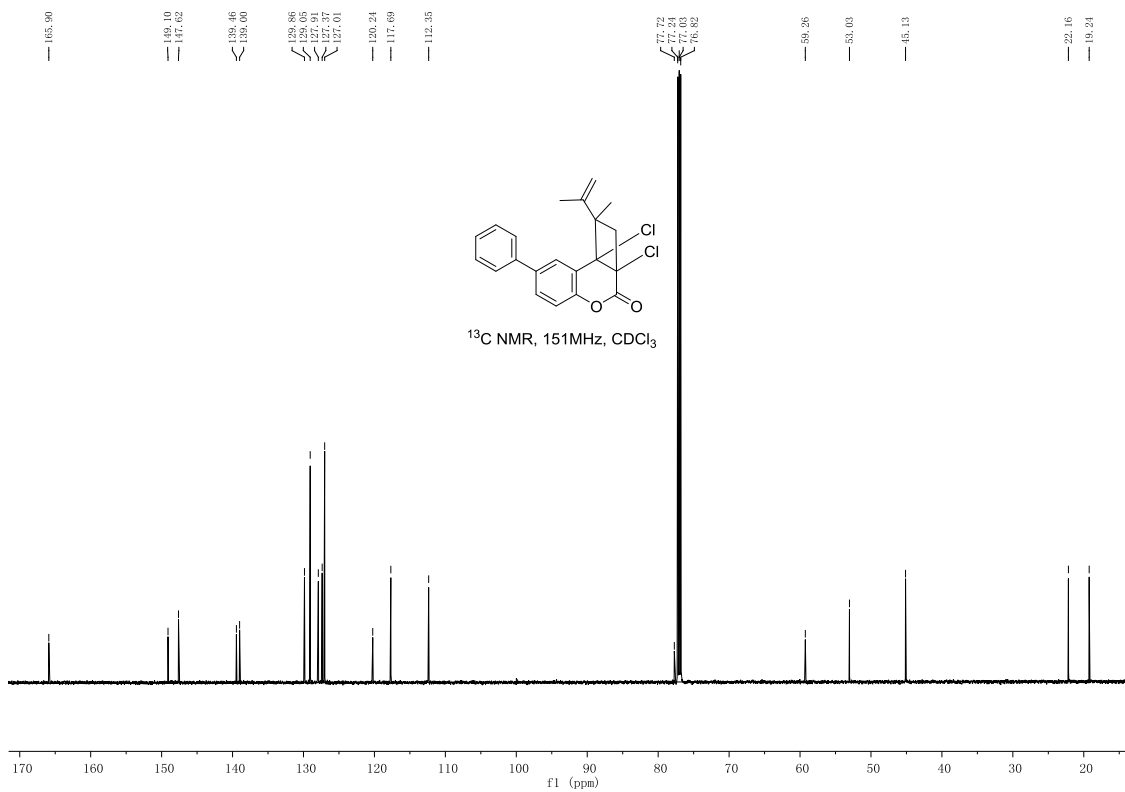

4i

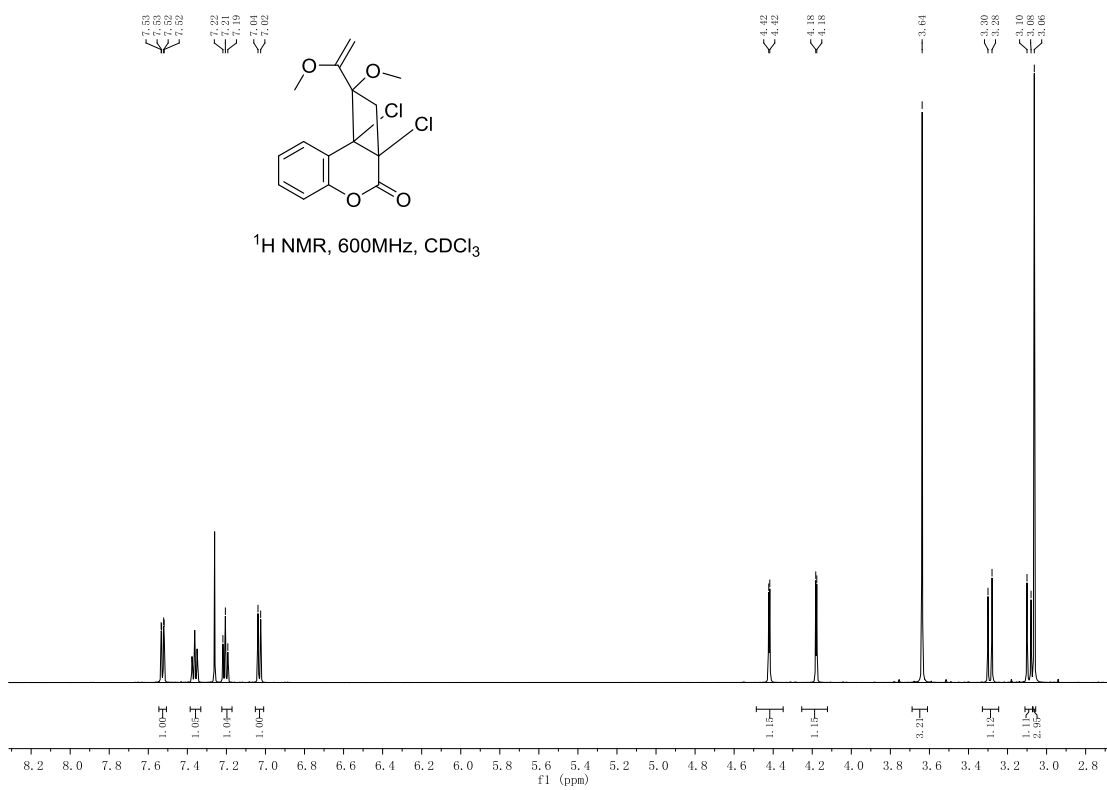

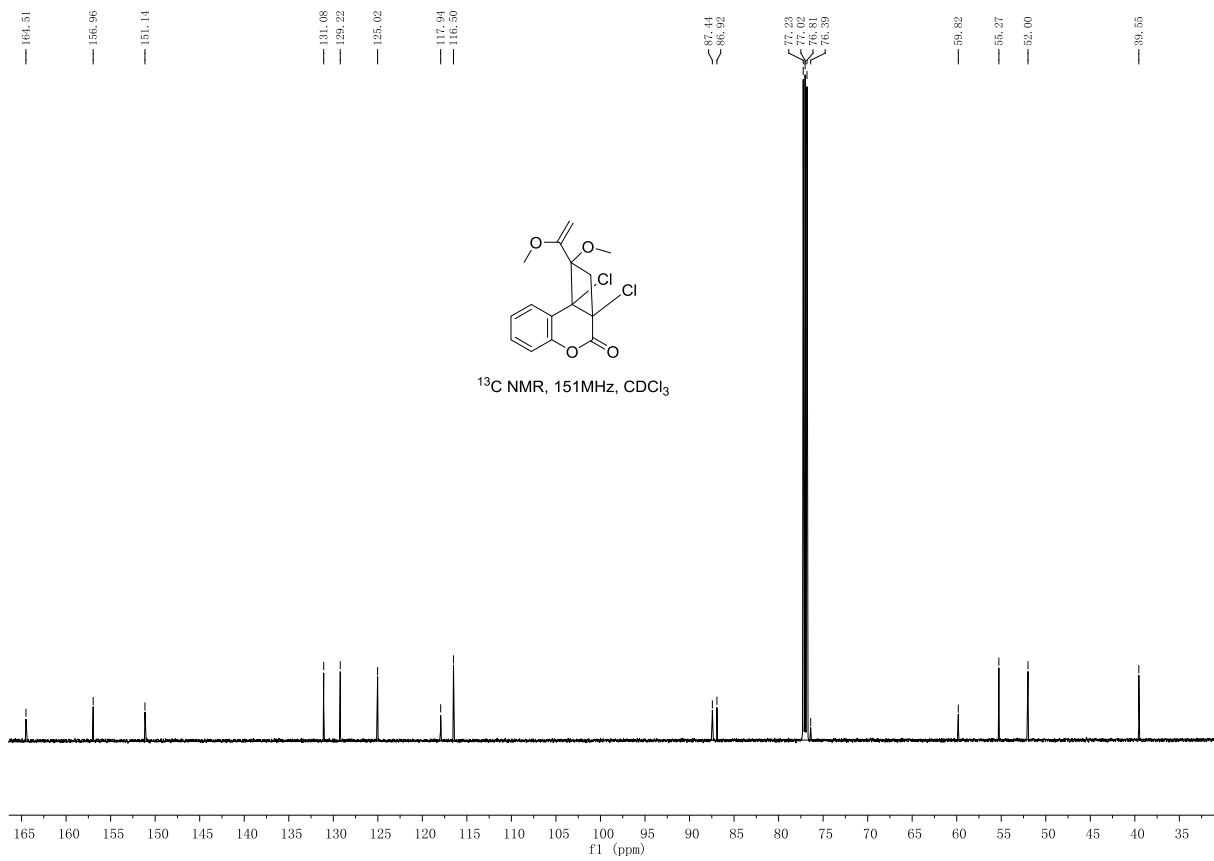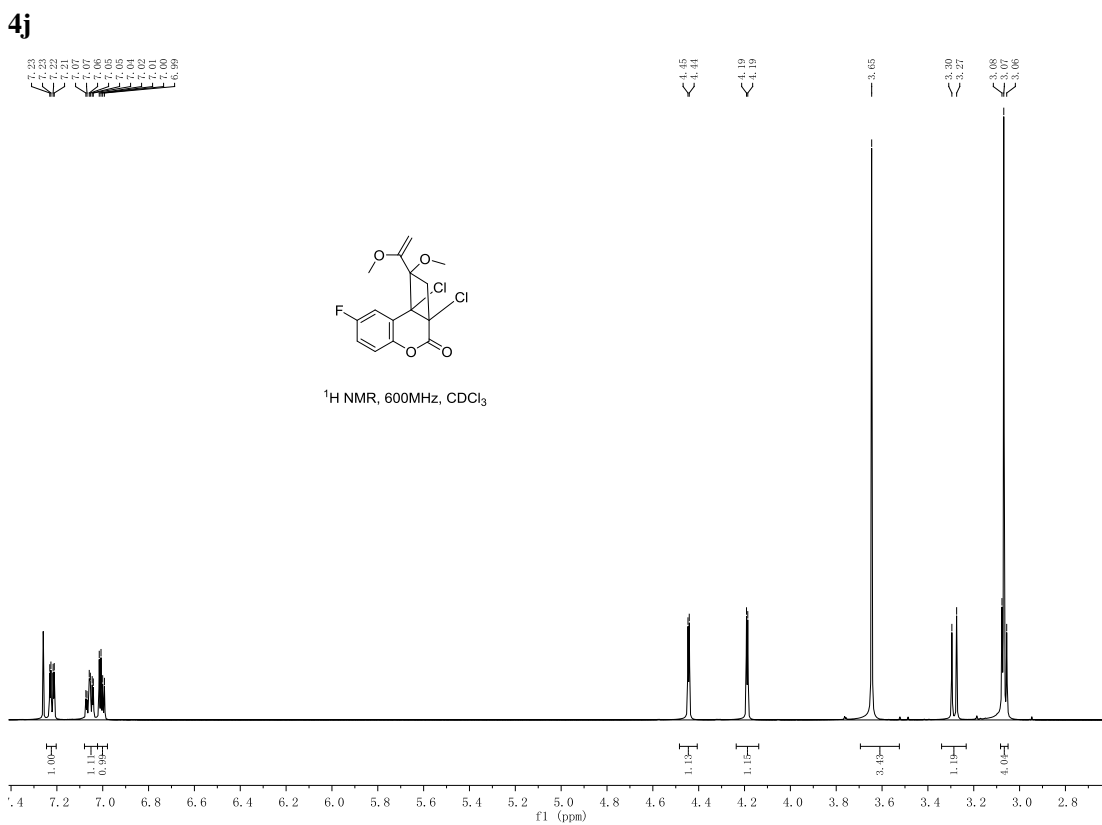

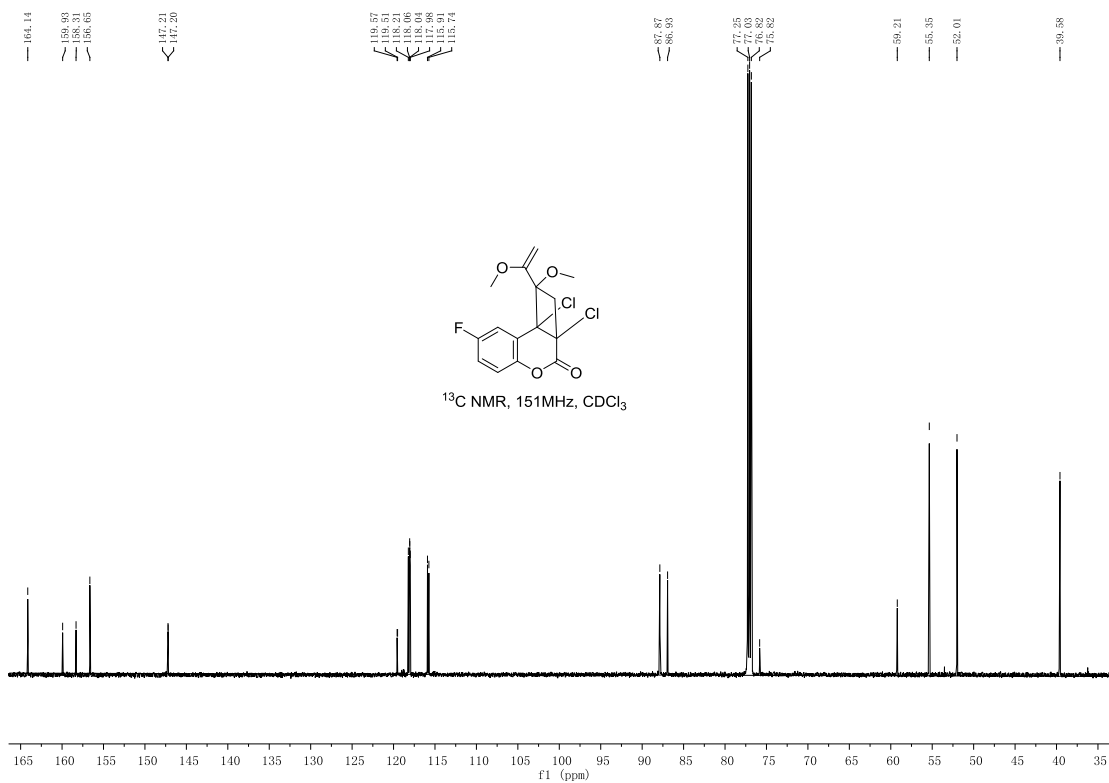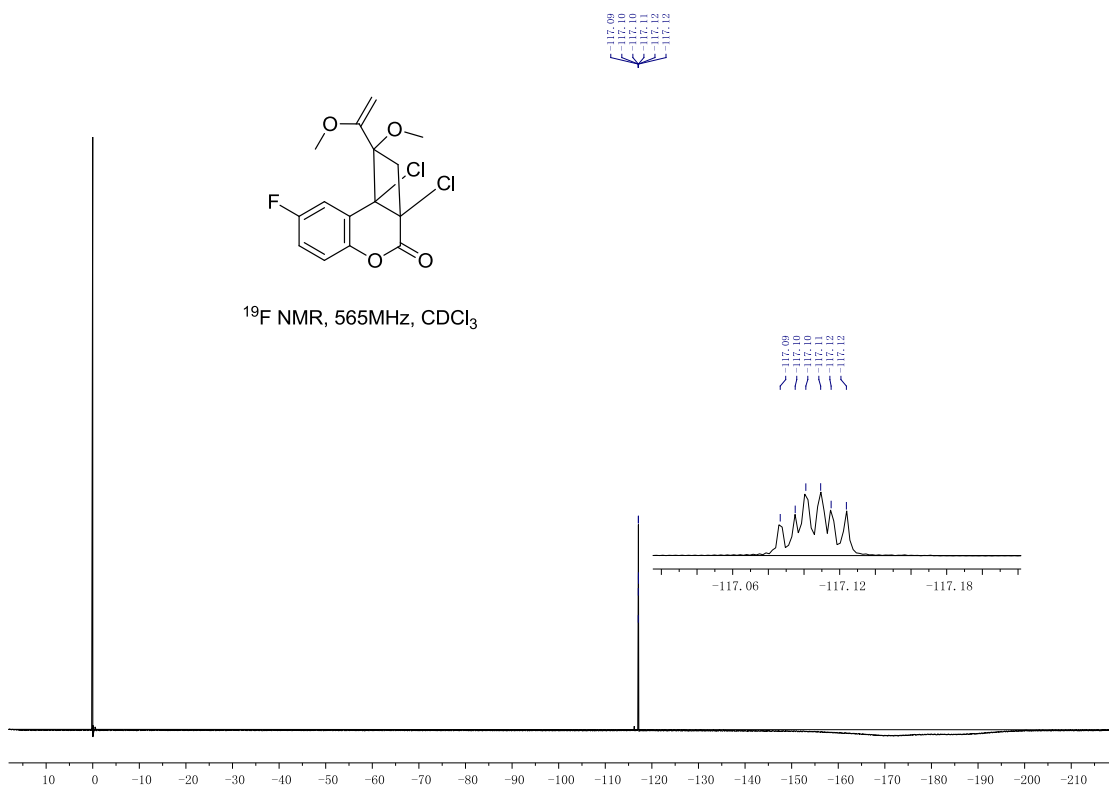



4k

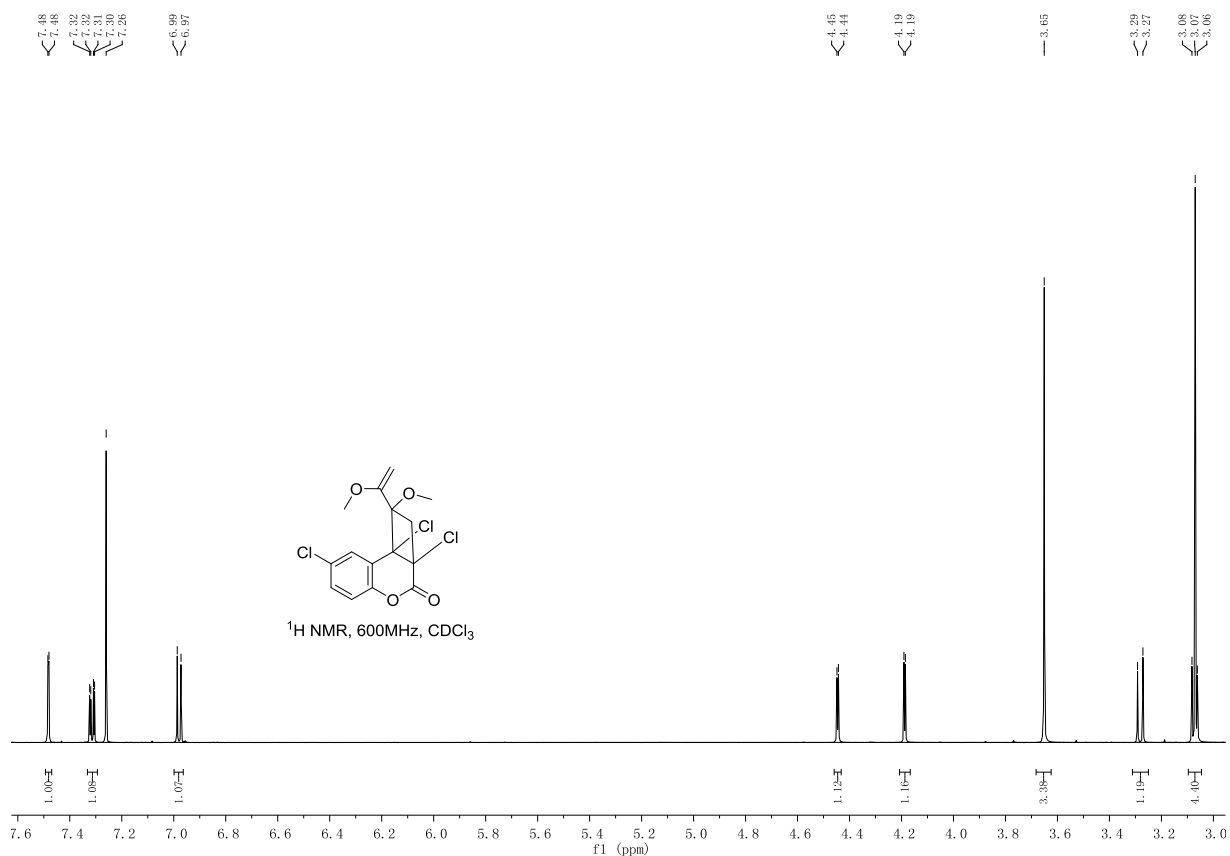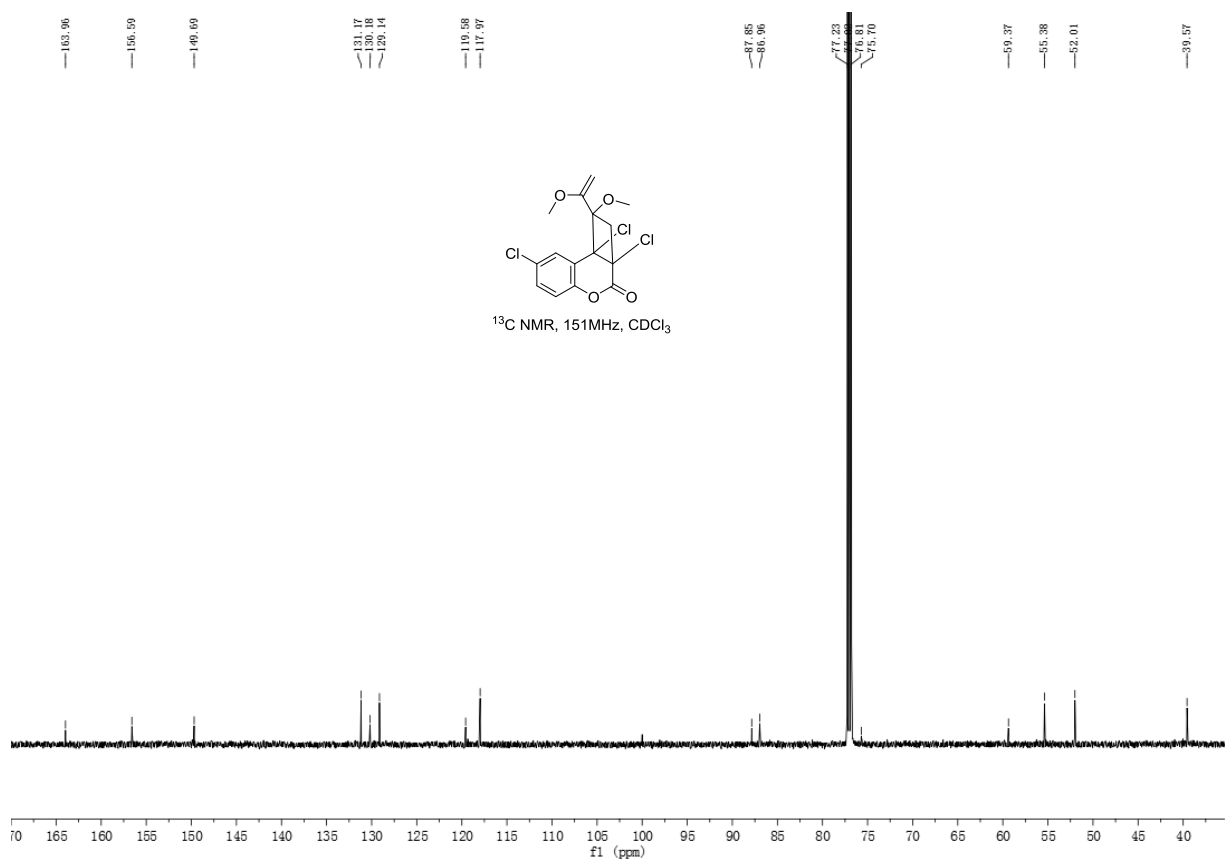

41

7.62  
7.62  
7.47  
7.46  
7.45  
7.45

6.93  
6.91

4.45  
4.44

4.19  
4.18

3.65

3.29  
3.27

3.08  
3.06

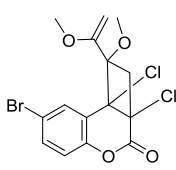

<sup>1</sup>H NMR, 600MHz, CDCl<sub>3</sub>

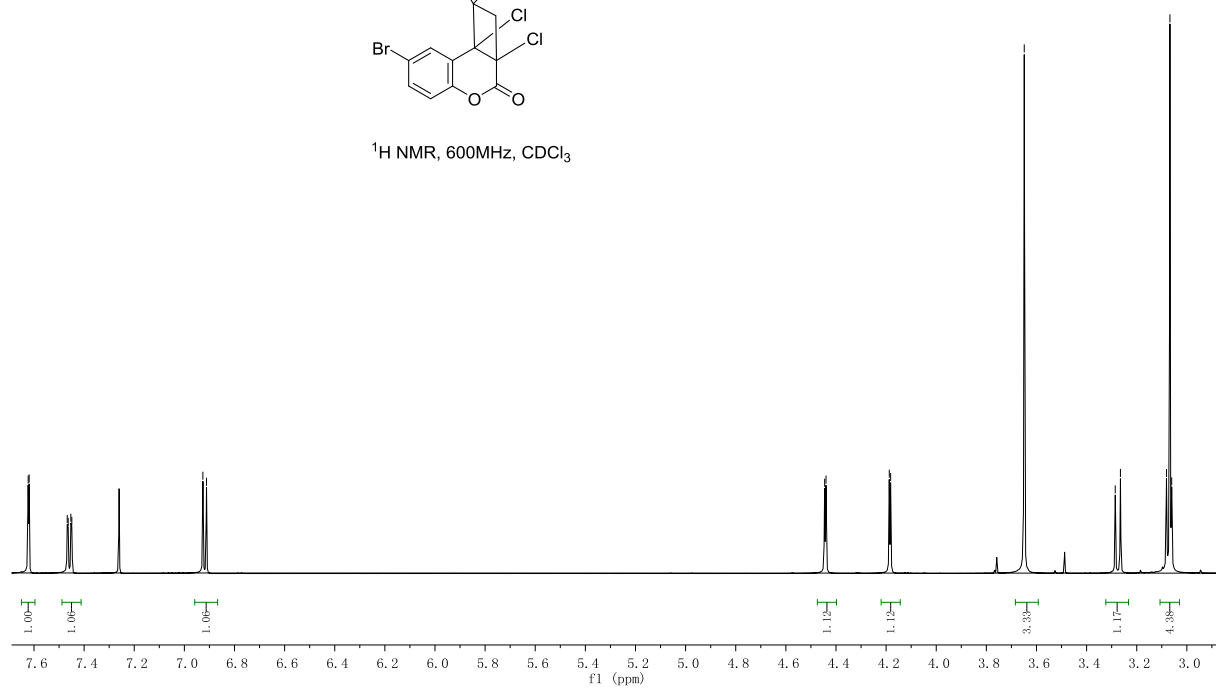

163.87  
156.56  
150.22  
134.07  
132.03  
119.93  
117.52  
117.52  
87.83  
86.97  
77.23  
77.02  
76.81  
76.61  
59.42  
55.37  
51.99  
39.56

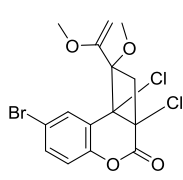

<sup>13</sup>C NMR, 151MHz, CDCl<sub>3</sub>

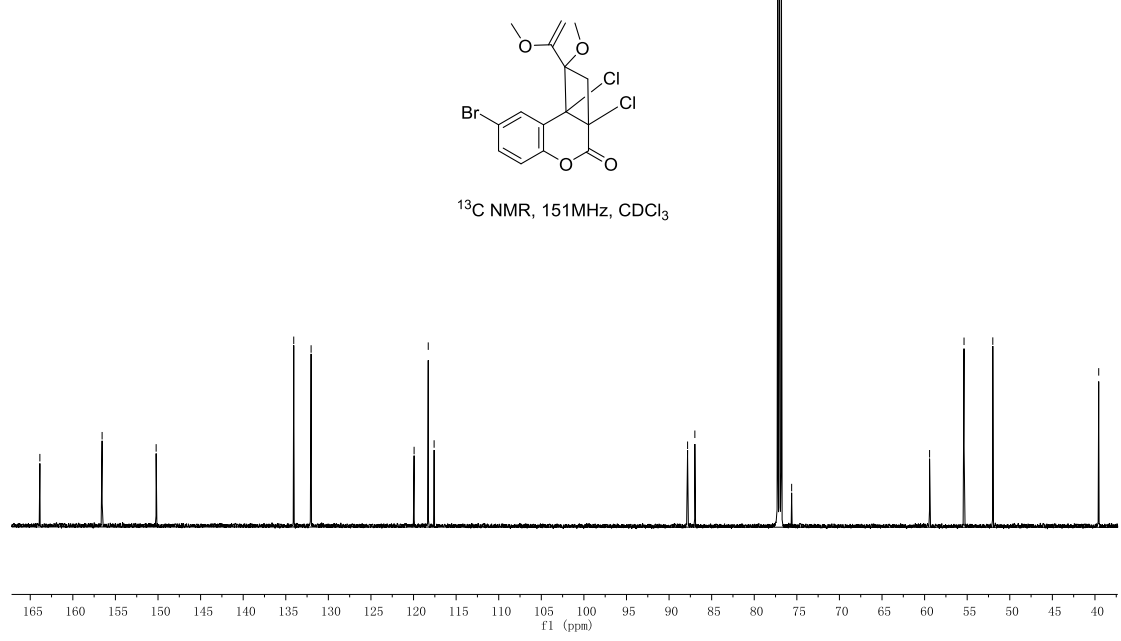

5c

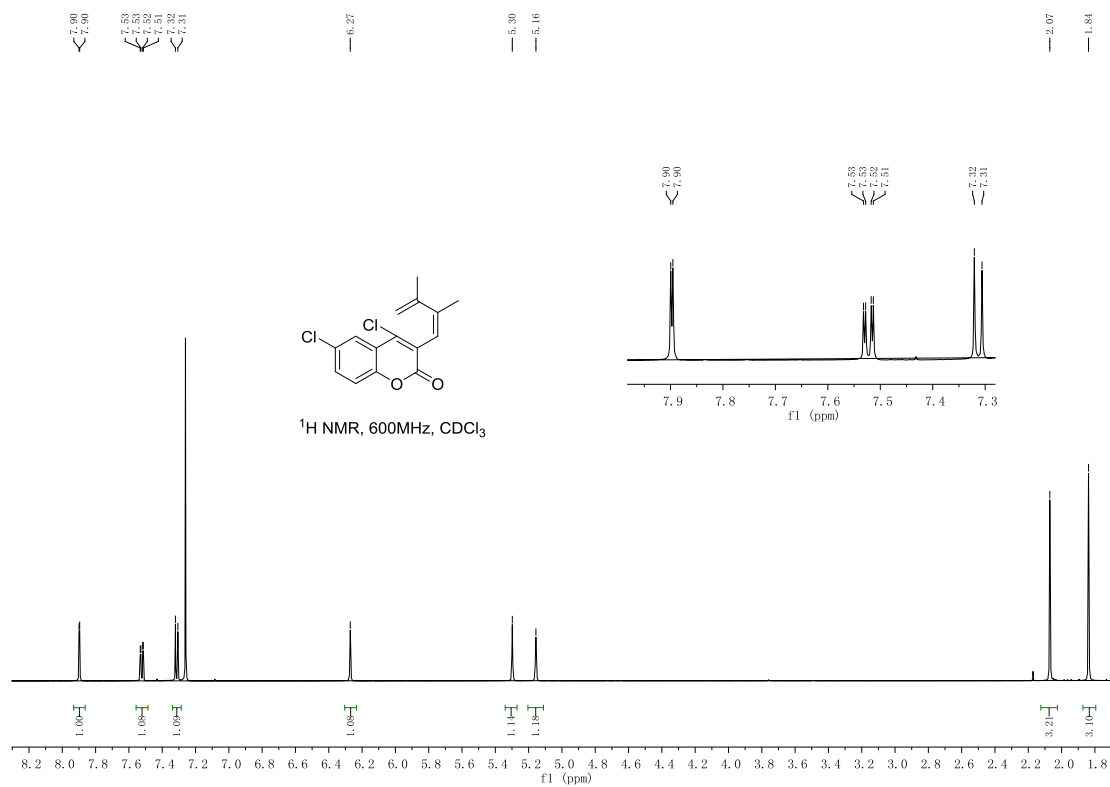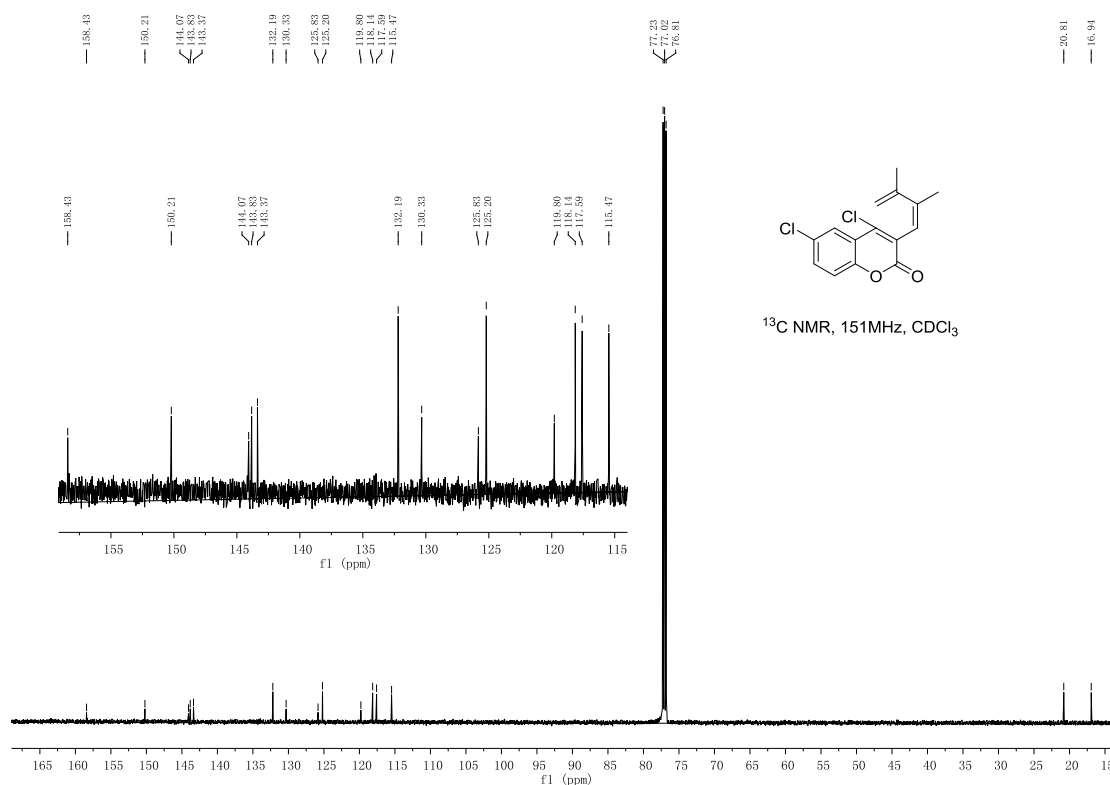

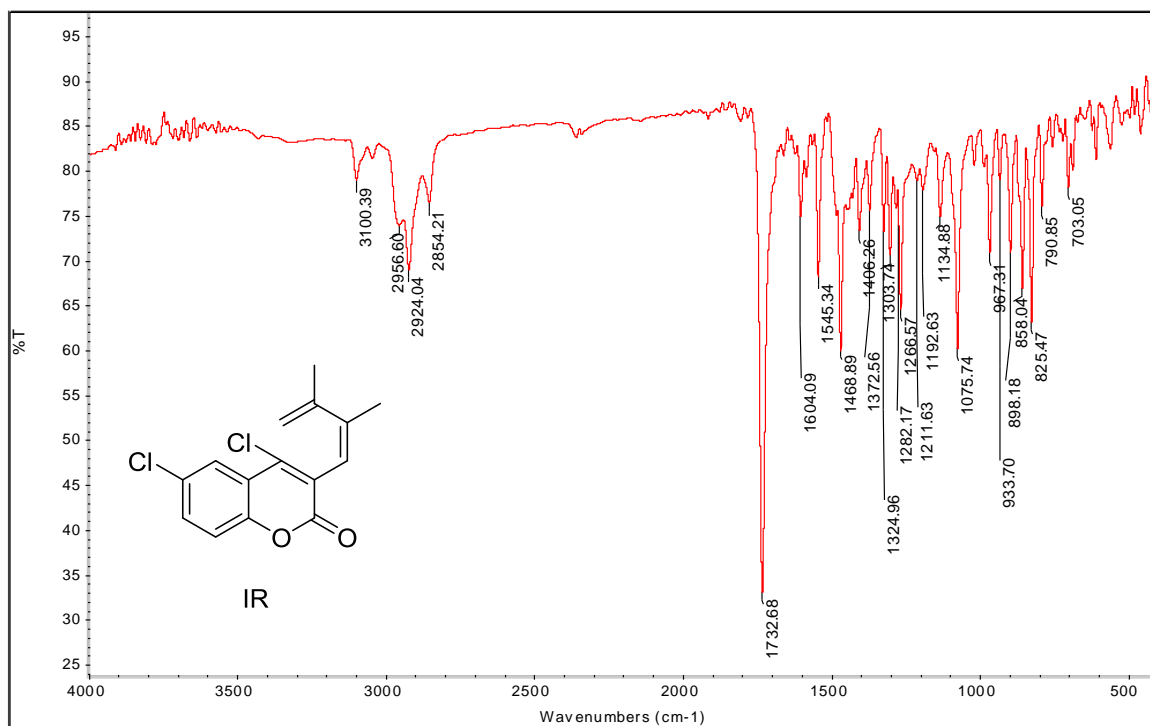

Elemental composition search on mass 295.03

m/z= 290.03-300.03

| m/z      | Theo. Mass | Delta (ppm) | RDB equiv. | Composition                                                      |
|----------|------------|-------------|------------|------------------------------------------------------------------|
| 295.0286 | 295.0287   | -0.48       | 8.5        | C <sub>15</sub> H <sub>13</sub> O <sub>2</sub> Cl <sub>2</sub>   |
|          | 295.0291   | -1.71       | 22.5       | C <sub>22</sub> H <sub>3</sub> N <sub>2</sub>                    |
|          | 295.0274   | 4.07        | 9.0        | C <sub>13</sub> H <sub>11</sub> O N <sub>3</sub> Cl <sub>2</sub> |

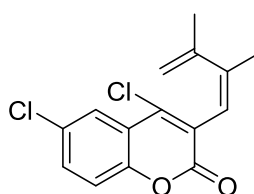

HRMS

D161493 #52 RT: 0.83 AV: 1 NL: 2.16E6  
T: FTMS + p ESI Full ms [100.00-1000.00]

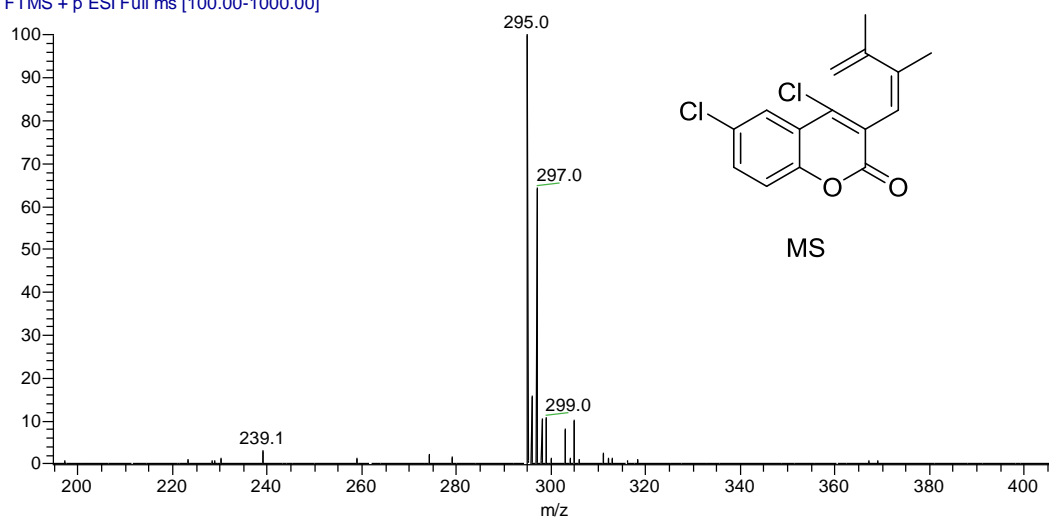

### 3. The crystal data

Crystal data for **1d** (Fig. 2): C<sub>15</sub>H<sub>11</sub>BrO<sub>2</sub>, M = 303.15, yellow needle, Bruker CCD diffractometer, Mo-K $\alpha$  radiation ( $\lambda = 0.71073$  Å), 0.32  $\times$  0.26  $\times$  0.14 mm, T = 293(2) K. Triclinic, space group *P*-1, a = 7.8650(11) Å, b = 8.6070(11) Å, c = 10.2615(15) Å,  $\alpha = 92.788(6)^\circ$ ,  $\beta = 112.186(6)^\circ$ ,  $\gamma = 105.046(4)^\circ$ , V = 612.75(15) Å<sup>3</sup>, Z = 2, D<sub>c</sub> = 1.643 g cm<sup>-3</sup>,  $\mu = 3.344$  mm<sup>-1</sup>, F(000) = 304. The structure was solved by direct method (SHELXL 97) and refined on F<sup>2</sup> by full-matrix least-squares method. A total of 2718 independent reflections [R (int) = 0.0366] were used in the refinement, which converged with R1 = 0.0564 and wR2 = 0.1076 (GOF = 1.020).

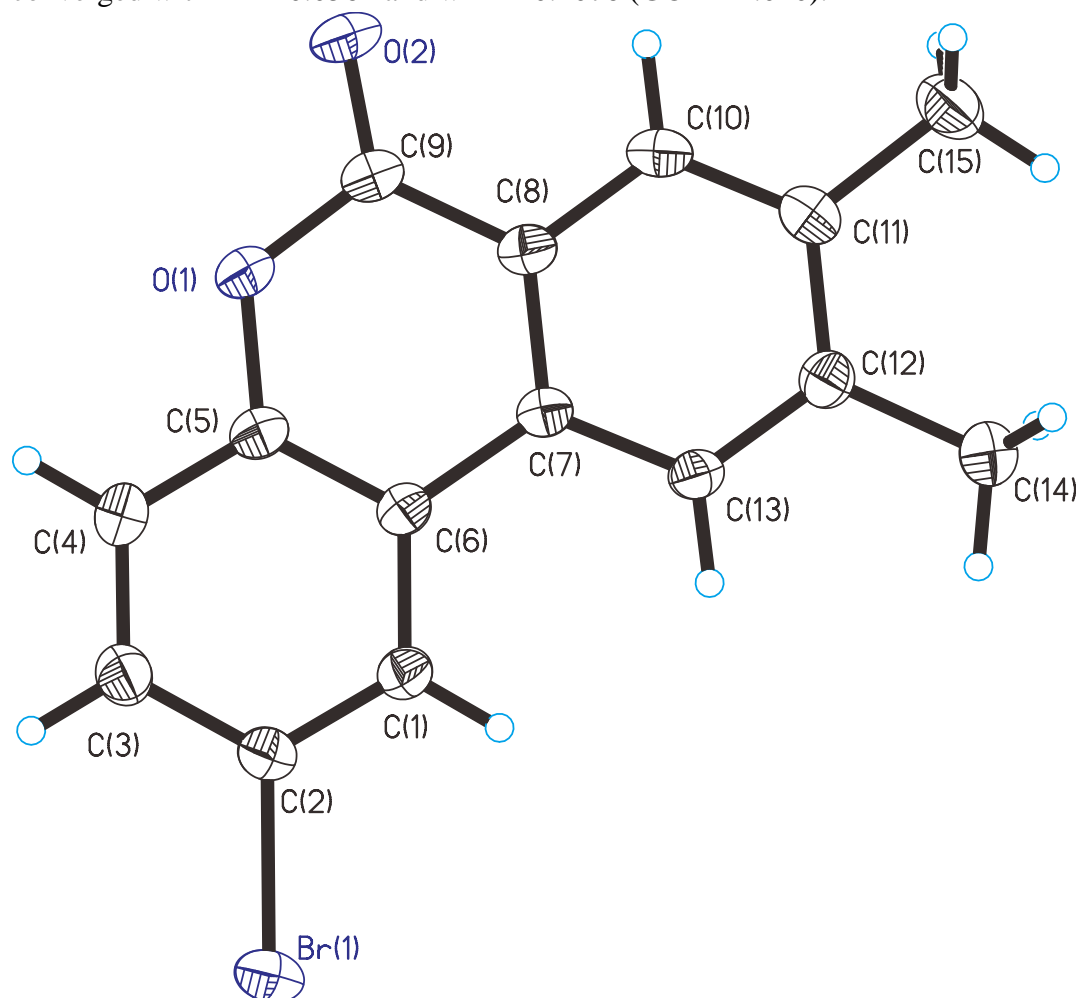

**Fig. 1** ORTEP drawing of **1d**, ellipsoids are drawn at 30 % probability level.

Crystal data for **4i** (Fig. 1): C<sub>15</sub>H<sub>14</sub>Cl<sub>2</sub>O<sub>4</sub>, M = 329.16, colorless blocks, Bruker CCD diffractometer, Mo-K $\alpha$  radiation ( $\lambda = 0.71073$  Å), 0.32  $\times$  0.28  $\times$  0.26 mm, T = 296(2) K. Monoclinic, space group *P*2<sub>1</sub>/*c*, a = 13.0766(3) Å, b = 8.0857(2) Å, c = 14.0760(4) Å,  $\alpha = 90.00^\circ$ ,  $\beta = 90.350(2)^\circ$ ,  $\gamma = 90.00^\circ$ , V = 1488.28(7) Å<sup>3</sup>, Z = 4, D<sub>c</sub> = 1.478 g cm<sup>-3</sup>,  $\mu = 0.448$  mm<sup>-1</sup>, F(000) = 688. The structure was solved by direct method (SHELXL 97) and refined on F<sub>2</sub> by full-matrix least-squares method. A total of 3393 independent reflections [R (int) = 0.0389] were used in the refinement, which converged with R1 = 0.0442 and wR2 = 0.1007 (GOF = 1.046).

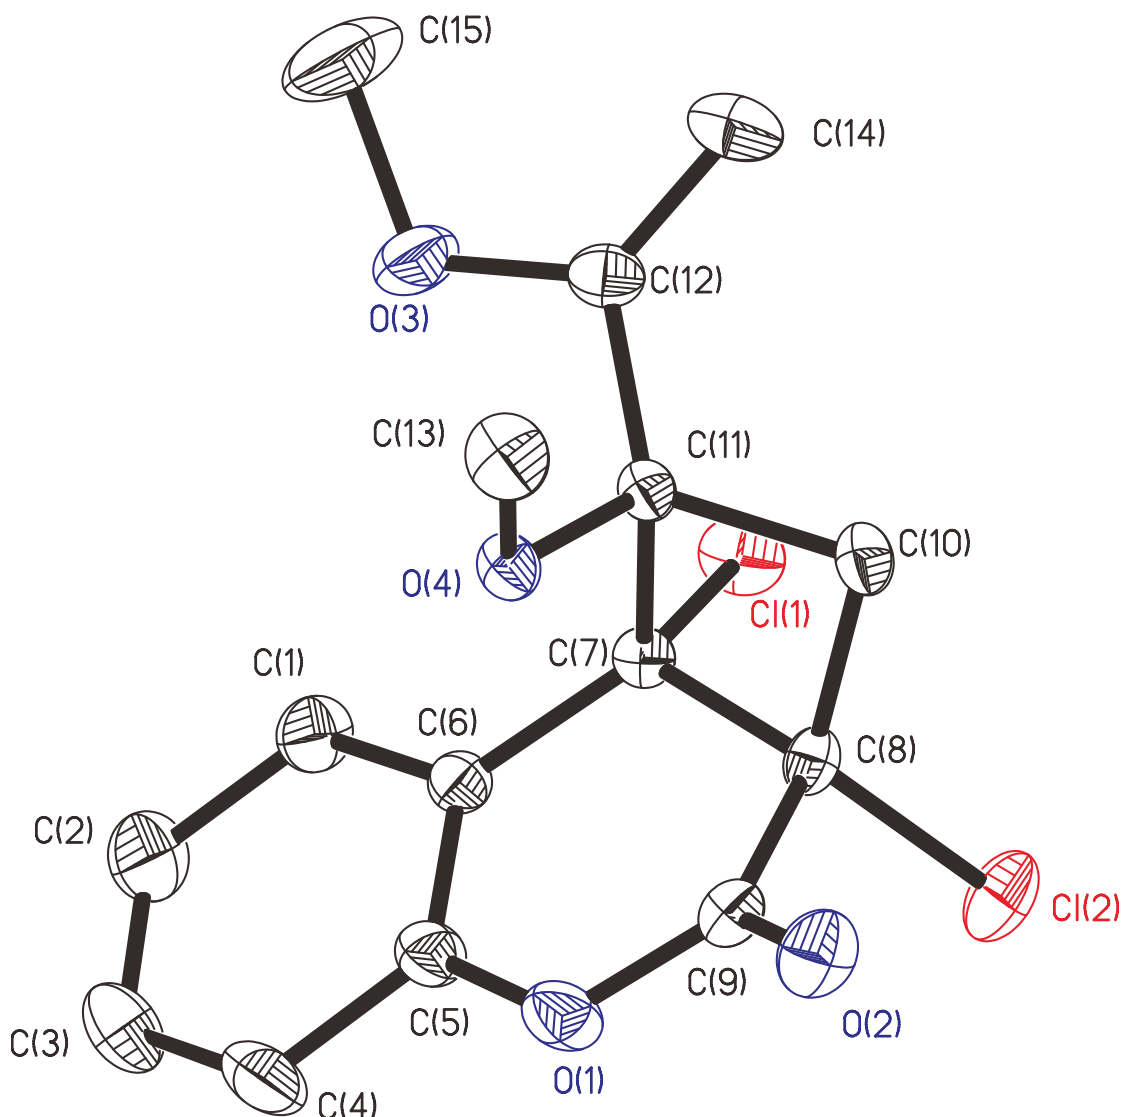

**Fig. 2** ORTEP drawing of **4i**, ellipsoids are drawn at 30 % probability level.
